# Supplementary material for: Regioinvent: a regionalized version of ecoinvent integrating detailed trade data
Source: Research Square preprint supplement (doi:10.21203/rs.3.rs-8159063/v1), 2025-12-01
Supplement: Supplementary file 1 [file 50977ff6bef7aa5c4c9b86f9.xlsx]

## Sheet: Cover sheet
Journal of Industrial Ecology – www.wileyonlinelibrary.com/journal/jie
SUPPORTING INFORMATION FOR:
Agez, M. & Majeau-Bettez, G. &. Regioinvent: a regionalized version of ecoinvent integrating detailed trade data. Journal of Industrial Ecology.
This supporting information provides the data plotted in Figure 4-4 and Figure4-5, the full results for Table 4-1, the table for the effect of cutoff on regioinvent, the effect of trade regionalization per ISIC sector, the effect of spatializatio per ISIC sector and the mapping between ecoinvent and HS6.

## Sheet: data_from_figure_4-4_in_text
Climate change	ecoinvent | RoW	ecoinvent | RER	regioinvent | AR	regioinvent | CA	regioinvent | CN	regioinvent | DE	regioinvent | ES	regioinvent | FI	regioinvent | FR	regioinvent | HK	regioinvent | HU	regioinvent | IN	regioinvent | IR	regioinvent | IT	regioinvent | KR	regioinvent | MA	regioinvent | MX	regioinvent | NL	regioinvent | PL	regioinvent | RoW	regioinvent | RU	regioinvent | SE	regioinvent | TH	regioinvent | UZ
nitrous oxide	0.808915	0.808915	0.597128	0.5739	0.765875	0.460319	0.515567	0.495237	0.5078	0.745699	0.454646	0.724021	0.709078	0.48688	0.655045	0.544231	0.657673	0.615962	0.681179	0.672921	0.483862	0.496818	0.689594	0.6877
direct emissions	2.07929e-08	2.11632e-08	1.54595e-08	1.48496e-08	1.95397e-08	1.21766e-08	1.35815e-08	1.31376e-08	1.34104e-08	1.90857e-08	1.17333e-08	1.83626e-08	1.81654e-08	1.26565e-08	1.68599e-08	1.42901e-08	1.70742e-08	1.62601e-08	1.73171e-08	1.73148e-08	1.22804e-08	1.3117e-08	1.76521e-08	1.76809e-08
oxygen, liquid	0.117855	0.0500537	0.0688375	0.0704256	0.121753	0.0232602	0.0347904	0.0222773	0.0292333	0.108162	0.0675927	0.141106	0.103847	0.0551849	0.0893307	0.0285067	0.076305	0.0319158	0.121432	0.0893307	0.0890893	0.0305907	0.115302	0.0893307
rest	0.0732306	0.0600814	0.0515386	0.0440127	0.0619976	0.0324379	0.0250806	0.0259424	0.0268514	0.0633454	0.0279955	0.0471295	0.0585366	0.0321524	0.0509521	0.0651465	0.0358597	0.029028	0.0426068	0.0624304	0.05559	0.0245863	0.0387084	0.0623799
total	1	0.91905	0.717504	0.688338	0.949626	0.516017	0.575438	0.543457	0.563885	0.917207	0.550234	0.912256	0.871461	0.574217	0.795328	0.637884	0.769837	0.676906	0.845218	0.824682	0.628541	0.551995	0.843605	0.839411
Water scarcity	ecoinvent | RoW	ecoinvent | RER	regioinvent | AR	regioinvent | CA	regioinvent | CN	regioinvent | DE	regioinvent | ES	regioinvent | FI	regioinvent | FR	regioinvent | HK	regioinvent | HU	regioinvent | IN	regioinvent | IR	regioinvent | IT	regioinvent | KR	regioinvent | MA	regioinvent | MX	regioinvent | NL	regioinvent | PL	regioinvent | RoW	regioinvent | RU	regioinvent | SE	regioinvent | TH	regioinvent | UZ
nitrous oxide	0.81103	0.81103	0.770943	0.393022	0.566807	0.27562	0.748949	0.225343	0.404293	0.582365	0.269946	0.562975	1.18895	0.483914	0.570855	0.640636	0.467075	0.437416	0.427214	0.57804	0.207567	0.281948	0.51362	0.65921
direct emissions	0.0233639	0.0233639	0.0204893	0.00428134	0.0136391	0.00141285	0.044954	0.0013211	0.00795106	0.00572477	0.00136392	0.0221406	0.0428134	0.0283791	0.000844049	0.0562078	0.0233027	0.00118655	0.00192661	0.0233639	0.00452599	0.00144954	0.00654434	0.0503974
oxygen, liquid	0.150237	0.167853	0.159022	0.123465	0.0798652	0.0432125	0.161211	0.0206315	0.0289982	0.097835	0.0237019	0.123011	0.230593	0.149862	0.126326	0.242732	0.12002	0.0179919	0.0325939	0.126326	0.0458221	0.0318776	0.0379888	0.126326
rest	0.0153688	0.0176412	0.0169338	0.00916665	0.011489	0.00841426	0.0188633	0.00848634	0.0103722	0.0112795	0.0083218	0.0144019	0.0109913	0.0307465	0.0105061	0.0108195	0.00880453	0.00783352	0.0101881	0.010511	0.0180237	0.00774584	0.0088688	0.0131637
total	1	1.01989	0.967388	0.529935	0.671801	0.32866	0.973977	0.255782	0.451614	0.697204	0.303334	0.722529	1.47335	0.692902	0.708531	0.950395	0.619202	0.464428	0.471923	0.738241	0.275939	0.323021	0.567022	0.849097

## Sheet: Full results Table 4-1
	trade regionalization	spatialization	total regionalization
('Climate change, ecosystem quality, long term', 'Ecosystem quality')	0.110172	0	0.110172
('Climate change, ecosystem quality, short term', 'Ecosystem quality')	0.105905	0	0.105905
('Climate change, human health, long term', 'Human health')	0.110172	0	0.110172
('Climate change, human health, short term', 'Human health')	0.105905	0	0.105905
('Climate change, long term', 'Midpoint')	0.108262	0	0.108262
('Climate change, short term', 'Midpoint')	0.106216	0	0.106216
('Fisheries impact', 'Ecosystem quality')	0	0	0
('Fossil and nuclear energy use', 'Midpoint')	0.0808706	0	0.0808706
('Freshwater acidification', 'Midpoint')	0.135907	0.398716	0.534623
('Freshwater acidification', 'Ecosystem quality')	0.137564	0.686989	0.824553
('Freshwater ecotoxicity', 'Midpoint')	0.0831848	0	0.0831848
('Freshwater ecotoxicity, long term', 'Ecosystem quality')	0.101855	0	0.101855
('Freshwater ecotoxicity, short term', 'Ecosystem quality')	0.0527334	0	0.0527334
('Freshwater eutrophication', 'Midpoint')	0.0816253	0.256089	0.337714
('Freshwater eutrophication', 'Ecosystem quality')	0.0816253	0.256089	0.337714
('Human toxicity cancer', 'Midpoint')	0.036564	0	0.036564
('Human toxicity cancer, long term', 'Human health')	0.0992561	0	0.0992561
('Human toxicity cancer, short term', 'Human health')	0.0337887	0	0.0337887
('Human toxicity non-cancer', 'Midpoint')	0.0793664	0	0.0793664
('Human toxicity non-cancer, long term', 'Human health')	0.0921169	0	0.0921169
('Human toxicity non-cancer, short term', 'Human health')	0.0523984	0	0.0523984
('Ionizing radiations', 'Midpoint')	0.584342	0	0.584342
('Ionizing radiations, ecosystem quality', 'Ecosystem quality')	0.551265	0	0.551265
('Ionizing radiations, human health', 'Human health')	0.584342	0	0.584342
('Land occupation, biodiversity', 'Midpoint')	0.122069	0.0836533	0.205722
('Land occupation, biodiversity', 'Ecosystem quality')	0.122069	0.0836533	0.205722
('Land transformation, biodiversity', 'Midpoint')	0.0602403	0.11475	0.17499
('Land transformation, biodiversity', 'Ecosystem quality')	0.0602403	0.11475	0.17499
('Marine acidification, long term', 'Ecosystem quality')	0.112395	0	0.112395
('Marine acidification, short term', 'Ecosystem quality')	0.112396	0	0.112396
('Marine ecotoxicity, long term', 'Ecosystem quality')	0.0959833	0	0.0959833
('Marine ecotoxicity, short term', 'Ecosystem quality')	0.041526	0	0.041526
('Marine eutrophication', 'Midpoint')	0.0881748	0.127326	0.215501
('Marine eutrophication', 'Ecosystem quality')	0.0881748	0.127326	0.215501
('Mineral resources use', 'Midpoint')	0.0185944	0	0.0185944
('Ozone layer depletion', 'Midpoint')	0.0834723	0	0.0834723
('Ozone layer depletion', 'Human health')	0.0834723	0	0.0834723
('Particulate matter formation', 'Midpoint')	0.130563	0.27156	0.402123
('Particulate matter formation', 'Human health')	0.130563	0.27156	0.402123
('Photochemical ozone formation', 'Midpoint')	0.111174	0	0.111174
('Photochemical ozone formation, ecosystem quality', 'Ecosystem quality')	0.108811	0	0.108811
('Photochemical ozone formation, human health', 'Human health')	0.111174	0	0.111174
('Terrestrial acidification', 'Midpoint')	0.1297	0.289355	0.419055
('Terrestrial acidification', 'Ecosystem quality')	0.129215	0.241878	0.371093
('Terrestrial ecotoxicity, long term', 'Ecosystem quality')	0.0959669	0	0.0959669
('Terrestrial ecotoxicity, short term', 'Ecosystem quality')	0.041526	0	0.041526
('Thermally polluted water', 'Ecosystem quality')	0.352922	0	0.352922
('Water availability, freshwater ecosystem', 'Ecosystem quality')	0.199557	0	0.199557
('Water availability, human health', 'Human health')	0.199557	-0.0291965	0.17036
('Water availability, terrestrial ecosystem', 'Ecosystem quality')	0.144816	0.196081	0.340897
('Water scarcity', 'Midpoint')	0.199557	0.0866168	0.286173
('Total human health', 'Human health')	0.0903851	0.0482701	0.138655
('Total ecosystem quality', 'Ecosystem quality')	0.0724923	0.0439092	0.116401

## Sheet: Effect of cutoff of regioinvent
	regio99 (%)	regio90 (%)	regio75 (%)
('Climate change, ecosystem quality, long term', 'Ecosystem quality')	0.481112	1.62875	2.35422
('Climate change, ecosystem quality, short term', 'Ecosystem quality')	0.449947	1.66824	2.40313
('Climate change, human health, long term', 'Human health')	0.481112	1.62875	2.35422
('Climate change, human health, short term', 'Human health')	0.449947	1.66824	2.40313
('Climate change, long term', 'Midpoint')	0.462464	1.58458	2.28742
('Climate change, short term', 'Midpoint')	0.44153	1.76251	2.49358
('Fisheries impact', 'Ecosystem quality')	0	0	0
('Fossil and nuclear energy use', 'Midpoint')	0.288735	1.1332	1.56346
('Freshwater acidification', 'Midpoint')	2.25165	10.1893	16.0288
('Freshwater acidification', 'Ecosystem quality')	2.051	9.35359	14.0912
('Freshwater ecotoxicity', 'Midpoint')	0.963945	2.6863	4.48878
('Freshwater ecotoxicity, long term', 'Ecosystem quality')	1.04361	2.66656	3.96421
('Freshwater ecotoxicity, short term', 'Ecosystem quality')	2.30901	5.64405	15.7486
('Freshwater eutrophication', 'Midpoint')	14.4704	25.1123	30.3802
('Freshwater eutrophication', 'Ecosystem quality')	14.4704	25.1123	30.3802
('Human toxicity cancer', 'Midpoint')	0.386183	0.847494	1.10269
('Human toxicity cancer, long term', 'Human health')	0.705848	2.11048	2.73269
('Human toxicity cancer, short term', 'Human health')	0.396884	0.823255	1.07836
('Human toxicity non-cancer', 'Midpoint')	0.615395	1.7992	2.23563
('Human toxicity non-cancer, long term', 'Human health')	0.694243	2.00162	2.61601
('Human toxicity non-cancer, short term', 'Human health')	0.615761	1.54589	1.86247
('Ionizing radiations', 'Midpoint')	1.77917	9.20323	13.7417
('Ionizing radiations, ecosystem quality', 'Ecosystem quality')	1.6264	8.67324	13.1345
('Ionizing radiations, human health', 'Human health')	1.77917	9.20323	13.7417
('Land occupation, biodiversity', 'Midpoint')	1.06974	4.62199	6.21649
('Land occupation, biodiversity', 'Ecosystem quality')	1.06974	4.62199	6.21648
('Land transformation, biodiversity', 'Midpoint')	8.22963	9.37104	11.6817
('Land transformation, biodiversity', 'Ecosystem quality')	8.22963	9.37104	11.6817
('Marine acidification, long term', 'Ecosystem quality')	0.550987	1.80143	2.59822
('Marine acidification, short term', 'Ecosystem quality')	0.550987	1.80143	2.59823
('Marine ecotoxicity, long term', 'Ecosystem quality')	1.77709	3.83172	5.35131
('Marine ecotoxicity, short term', 'Ecosystem quality')	0.948656	1.7709	2.32927
('Marine eutrophication', 'Midpoint')	0.810591	2.97686	4.68446
('Marine eutrophication', 'Ecosystem quality')	0.810591	2.97686	4.68446
('Mineral resources use', 'Midpoint')	2.33952	2.25816	2.37656
('Ozone layer depletion', 'Midpoint')	0.749101	1.743	2.29477
('Ozone layer depletion', 'Human health')	0.749101	1.743	2.29477
('Particulate matter formation', 'Midpoint')	2.16336	5.55081	7.87273
('Particulate matter formation', 'Human health')	2.16336	5.55081	7.87273
('Photochemical ozone formation', 'Midpoint')	0.508253	1.90167	2.58268
('Photochemical ozone formation, ecosystem quality', 'Ecosystem quality')	0.486322	2.01925	2.69952
('Photochemical ozone formation, human health', 'Human health')	0.508253	1.90167	2.58268
('Terrestrial acidification', 'Midpoint')	1.14396	4.80042	7.30489
('Terrestrial acidification', 'Ecosystem quality')	1.0145	4.66161	6.47917
('Terrestrial ecotoxicity, long term', 'Ecosystem quality')	1.77682	3.83566	5.35402
('Terrestrial ecotoxicity, short term', 'Ecosystem quality')	0.948656	1.7709	2.32927
('Thermally polluted water', 'Ecosystem quality')	0.558799	4.15781	6.20218
('Water availability, freshwater ecosystem', 'Ecosystem quality')	0.311406	1.99622	3.11894
('Water availability, human health', 'Human health')	11.4682	37.6357	51.7167
('Water availability, terrestrial ecosystem', 'Ecosystem quality')	2.45958	9.64822	12.246
('Water scarcity', 'Midpoint')	3.05752	9.57328	13.5376
('Total human health', 'Human health')	0.420266	1.75885	2.5834
('Total ecosystem quality', 'Ecosystem quality')	0.397193	1.23981	2.19294

## Sheet: Trade regio effect per sector
	01: Crop and animal production, hunting and related service activities	02: Forestry and logging	03: Fishing and aquaculture	07: Mining of metal ores	08: Other mining and quarrying	10: Manufacture of food products	13: Manufacture of textiles	16: Manufacture of wood and of products of wood and cork, except furniture; manufacture of articles of straw and plaiting materials	17: Manufacture of paper and paper products	19: Manufacture of coke and refined petroleum products	20: Manufacture of chemicals and chemical products	22: Manufacture of rubber and plastics products	23: Manufacture of other non-metallic mineral products	24: Manufacture of basic metals	25: Manufacture of fabricated metal products, except machinery and equipment	26: Manufacture of computer, electronic and optical products	27: Manufacture of electrical equipment	28: Manufacture of machinery and equipment n.e.c.	29: Manufacture of motor vehicles, trailers and semi-trailers	30: Manufacture of other transport equipment	33: Repair and installation of machinery and equipment	35: Electricity, gas, steam and air conditioning supply	38: Waste collection, treatment and disposal activities; materials recovery	42: Civil engineering	43: Specialized construction activities
Sample size	246	37	19	65	40	75	23	116	57	51	812	22	126	139	27	102	82	127	25	32	10	24	20	55	22
('Climate change, ecosystem quality, long term', 'Ecosystem quality')	0.0784253	0.0211419	0.0561696	0.141345	0.145803	0.133178	0.101978	0.146215	0.14424	0.0903456	0.104276	0.0977782	0.0896127	0.109027	0.134429	0.109421	0.0818686	0.104881	0.0903889	0.0877497	0.0468182	0.0844926	0.0477678	0.0885614	0.140145
('Climate change, ecosystem quality, short term', 'Ecosystem quality')	0.0678974	0.0205905	0.0750089	0.123471	0.14109	0.119223	0.0892724	0.140491	0.142456	0.109171	0.100965	0.0921663	0.0887483	0.102312	0.132054	0.105565	0.0782789	0.101177	0.0869011	0.0826353	0.0446365	0.0775315	0.0604663	0.0849419	0.135917
('Climate change, human health, long term', 'Human health')	0.0784253	0.0211419	0.0561696	0.141345	0.145803	0.133178	0.101978	0.146215	0.14424	0.0903456	0.104276	0.0977782	0.0896127	0.109027	0.134429	0.109421	0.0818686	0.104881	0.0903889	0.0877497	0.0468182	0.0844926	0.0477678	0.0885614	0.140145
('Climate change, human health, short term', 'Human health')	0.0678974	0.0205905	0.0750089	0.123471	0.14109	0.119223	0.0892724	0.140491	0.142456	0.109171	0.100965	0.0921663	0.0887483	0.102312	0.132054	0.105565	0.0782789	0.101177	0.0869011	0.0826353	0.0446365	0.0775315	0.0604663	0.0849419	0.135917
('Climate change, long term', 'Midpoint')	0.0721905	0.0206543	0.056346	0.134175	0.144415	0.125997	0.0949345	0.143785	0.143049	0.0927688	0.103657	0.096631	0.0892541	0.104816	0.133514	0.10838	0.0808439	0.103989	0.0893006	0.0860576	0.0462881	0.0909501	0.0468375	0.0873946	0.138897
('Climate change, short term', 'Midpoint')	0.0694289	0.0213854	0.0754544	0.137509	0.14002	0.120213	0.0926913	0.138358	0.141792	0.12258	0.100412	0.0909888	0.0885953	0.103032	0.130966	0.104407	0.0773507	0.10025	0.0864512	0.0809716	0.0438055	0.104672	0.0598754	0.0838134	0.133951
('Fisheries impact', 'Ecosystem quality')	0	0	0	0	0	0	0	0	0	0	0	0	0	0	0	0	0	0	0	0	0	0	0	0	0
('Fossil and nuclear energy use', 'Midpoint')	0.0802687	0.0169289	0.0512037	0.111273	0.111864	0.122618	0.102462	0.137167	0.122415	0.0233428	0.0593743	0.0568307	0.0961692	0.090349	0.115759	0.0702011	0.0503817	0.0786194	0.0707366	0.0545988	0.0294513	0.0773653	0.040897	0.066242	0.101971
('Freshwater acidification', 'Midpoint')	0.0860651	0.0687033	0.0670017	0.153311	0.119222	0.163312	0.0794097	0.222297	0.187828	0.100854	0.12254	0.136104	0.149773	0.148821	0.138437	0.124358	0.0762898	0.117286	0.072554	0.0992645	0.0576269	0.148287	0.114589	0.0904589	0.137445
('Freshwater acidification', 'Ecosystem quality')	0.0857196	0.0688891	0.0676582	0.157243	0.110861	0.166243	0.076677	0.234415	0.192347	0.103471	0.123034	0.138045	0.153012	0.1541	0.13867	0.125044	0.0762684	0.117204	0.0719867	0.0996026	0.057739	0.152535	0.116179	0.09154	0.135145
('Freshwater ecotoxicity', 'Midpoint')	0.0573796	0.0354266	0.0876606	0.0479353	0.093505	0.109376	0.079649	0.0905761	0.0750943	0.126783	0.0842383	0.108302	0.0987018	0.0786145	0.0785373	0.0614954	0.0400749	0.0652186	0.087872	0.0651606	0.028921	0.0655997	0.014845	0.0510864	0.102954
('Freshwater ecotoxicity, long term', 'Ecosystem quality')	0.072951	0.0347659	0.0529051	0.0458309	0.112794	0.137975	0.0931762	0.112489	0.125352	0.114018	0.109268	0.171965	0.116982	0.0910989	0.0949062	0.0686992	0.0512869	0.076109	0.0704206	0.0707656	0.0355846	0.0850369	0.0408846	0.0619577	0.0529143
('Freshwater ecotoxicity, short term', 'Ecosystem quality')	0.0484367	0.0627923	0.0793521	0.0698864	0.0635225	0.0638254	0.0550505	0.051131	0.0502776	0.0827968	0.0441333	0.0526691	0.0572469	0.0415493	0.0578055	0.0429566	0.0385556	0.0317481	0.0373945	0.0556847	0.0142399	0.0514835	0.0145732	0.0306252	0.038569
('Freshwater eutrophication', 'Midpoint')	0.0487064	0.00778184	0.0722505	0.126285	0.12292	0.083406	0.0389188	0.0127255	0.0463803	0.0771492	0.0693449	0.0610156	0.0950115	0.154819	0.0988164	0.0481615	0.0722134	0.0903706	0.150321	0.114888	0.0136551	0.11581	0.0604616	0.11267	0.110824
('Freshwater eutrophication', 'Ecosystem quality')	0.0487064	0.00778184	0.0722505	0.126285	0.12292	0.083406	0.0389188	0.0127255	0.0463803	0.0771492	0.0693449	0.0610156	0.0950115	0.154819	0.0988164	0.0481615	0.0722134	0.0903706	0.150321	0.114888	0.0136551	0.11581	0.0604616	0.11267	0.110824
('Human toxicity cancer', 'Midpoint')	0.0260179	0.0214419	0.0262343	0.0173736	0.0475982	0.0376331	0.0392957	0.0458115	0.0614042	0.0409104	0.0319112	0.0552385	0.0545989	0.0227495	0.0294643	0.0353479	0.0306131	0.0243521	0.0144087	0.0263675	0.0146946	0.0372943	0.0141448	0.0171969	0.0427512
('Human toxicity cancer, long term', 'Human health')	0.0543608	0.0367266	0.0831427	0.0661654	0.158845	0.0910498	0.0538363	0.145515	0.150322	0.105278	0.0818941	0.15751	0.0999603	0.0948313	0.13867	0.0835809	0.0775593	0.112153	0.0828786	0.0803152	0.0339243	0.0971743	0.0873247	0.096998	0.111196
('Human toxicity cancer, short term', 'Human health')	0.0253464	0.021604	0.0251837	0.0127265	0.0499531	0.0457399	0.0408691	0.0353072	0.0510983	0.0400111	0.029085	0.0484062	0.0561253	0.0197173	0.0290996	0.0310046	0.026601	0.0259609	0.0129429	0.0268113	0.0132248	0.0248698	0.00925913	0.0173983	0.0384777
('Human toxicity non-cancer', 'Midpoint')	0.0409876	0.0309839	0.0858152	0.0451808	0.111261	0.0979348	0.0433509	0.116616	0.126931	0.0931909	0.0651244	0.111971	0.0813825	0.0655987	0.104743	0.0728292	0.0704367	0.0931746	0.0699397	0.0816682	0.0309644	0.0747964	0.0547821	0.0836612	0.0893848
('Human toxicity non-cancer, long term', 'Human health')	0.0461028	0.0392364	0.0787951	0.0605772	0.140645	0.0836119	0.0725132	0.133067	0.150984	0.114155	0.0765923	0.138282	0.0927393	0.081422	0.125454	0.0806149	0.0747303	0.102945	0.0749323	0.0860829	0.0297942	0.0889605	0.0807923	0.0918662	0.103074
('Human toxicity non-cancer, short term', 'Human health')	0.0229723	0.0213681	0.0646245	0.0298956	0.0726338	0.0606756	0.0268431	0.0567324	0.0771343	0.0567618	0.0423856	0.0781867	0.0583027	0.0503227	0.0741	0.0466572	0.0530308	0.0609903	0.0707951	0.0539122	0.0335186	0.087349	0.0265803	0.061239	0.0476643
('Ionizing radiations', 'Midpoint')	0.450405	0.268681	0.320565	0.591285	0.644609	0.601036	0.582434	1.05132	0.828748	0.372959	0.610504	0.62774	0.72756	0.516906	0.637456	0.455105	0.320113	0.46878	0.468547	0.388766	0.208213	0.792371	0.306103	0.369256	0.51809
('Ionizing radiations, ecosystem quality', 'Ecosystem quality')	0.395147	0.281612	0.337122	0.608767	0.623455	0.559266	0.442696	1.0375	0.890953	0.429385	0.535135	0.707374	0.674054	0.506133	0.598672	0.377711	0.266561	0.499211	0.407388	0.377431	0.154477	0.923778	0.239612	0.337548	0.341401
('Ionizing radiations, human health', 'Human health')	0.450405	0.268681	0.320565	0.591285	0.644609	0.601036	0.582434	1.05132	0.828748	0.372959	0.610504	0.62774	0.72756	0.516906	0.637456	0.455105	0.320113	0.46878	0.468547	0.388766	0.208213	0.792371	0.306103	0.369256	0.51809
('Land occupation, biodiversity', 'Midpoint')	0.0543432	0.00720773	0.0792806	0.0619626	0.0661426	0.0976353	0.0250386	0.00807262	0.0520042	0.150113	0.151791	0.168668	0.132049	0.162518	0.100002	0.087727	0.082019	0.101127	0.0762272	0.141041	0.0253045	0.142621	0.0602537	0.0875649	0.127602
('Land occupation, biodiversity', 'Ecosystem quality')	0.0543432	0.00720773	0.0792806	0.0619626	0.0661426	0.0976353	0.0250386	0.00807262	0.0520042	0.150113	0.151791	0.168668	0.132049	0.162518	0.100002	0.087727	0.082019	0.101127	0.0762272	0.141041	0.0253045	0.142621	0.0602537	0.0875649	0.127602
('Land transformation, biodiversity', 'Midpoint')	0.0401193	0.0585363	0.0645677	0.0253463	0.0336579	0.0317937	0.0435095	0.0571757	0.0912274	0.0278436	0.0571543	0.0774631	0.066253	0.0682899	0.0596645	0.0573976	0.0333399	0.0396579	0.0414449	0.0309025	0.0240205	0.0819386	0.0361029	0.0399946	0.0462589
('Land transformation, biodiversity', 'Ecosystem quality')	0.0401193	0.0585364	0.0645677	0.0253463	0.0336579	0.0317937	0.0435095	0.0571757	0.0912274	0.0278436	0.0571543	0.0774631	0.066253	0.0682899	0.0596645	0.0573976	0.0333399	0.0396579	0.0414449	0.0309025	0.0240205	0.0819386	0.0361029	0.0399946	0.0462589
('Marine acidification, long term', 'Ecosystem quality')	0.0879772	0.0226619	0.0559322	0.142324	0.147313	0.135543	0.114857	0.147031	0.145545	0.0900849	0.105199	0.0987615	0.0899228	0.109677	0.135488	0.110847	0.0828351	0.105685	0.0911114	0.088391	0.0477214	0.0805204	0.0483202	0.0892009	0.143079
('Marine acidification, short term', 'Ecosystem quality')	0.087977	0.0226612	0.0559324	0.142326	0.147313	0.135544	0.114855	0.147032	0.145546	0.090085	0.105199	0.0987615	0.0899229	0.109679	0.135489	0.110848	0.0828353	0.105685	0.0911121	0.0883919	0.0477216	0.0805206	0.0483204	0.0892014	0.14308
('Marine ecotoxicity, long term', 'Ecosystem quality')	0.0468231	0.0477554	0.0775331	0.12261	0.165604	0.114867	0.0250572	0.0840178	0.0803243	0.125154	0.093244	0.13388	0.147499	0.130958	0.0776788	0.0504485	0.0437227	0.0705642	0.0417796	0.0510238	0.00886437	0.0509047	0.0372415	0.0727909	0.0841291
('Marine ecotoxicity, short term', 'Ecosystem quality')	0.0237332	0.0332992	0.0197801	0.0408597	0.045978	0.0393747	0.0102517	0.045108	0.0728701	0.0639505	0.0319628	0.0346529	0.0579214	0.0553516	0.0510479	0.02534	0.0171095	0.0428113	0.0198851	0.0194945	0.00751433	0.0415594	0.0110627	0.0320872	0.0285701
('Marine eutrophication', 'Midpoint')	0.0497592	0.0608021	0.0589465	0.0604153	0.110957	0.0743907	0.0340833	0.0862192	0.136802	0.105166	0.0739319	0.0994868	0.101612	0.140145	0.115551	0.0758868	0.0494633	0.106403	0.084223	0.105505	0.0473658	0.103921	0.046724	0.085982	0.10659
('Marine eutrophication', 'Ecosystem quality')	0.0497592	0.0608021	0.0589465	0.0604153	0.110957	0.0743907	0.0340833	0.0862192	0.136802	0.105166	0.0739319	0.0994868	0.101612	0.140145	0.115551	0.0758868	0.0494633	0.106403	0.084223	0.105505	0.0473658	0.103921	0.046724	0.085982	0.10659
('Mineral resources use', 'Midpoint')	0.0154823	0.0130713	0.0175906	0.0071208	0.0167294	0.0257593	0.0236107	0.0243782	0.0342166	0.0240143	0.0140516	0.0170113	0.0106154	0.0118438	0.0195283	0.0148125	0.0111261	0.0214726	0.0198943	0.0258766	0.00573608	0.011248	0.00848951	0.0181238	0.0124818
('Ozone layer depletion', 'Midpoint')	0.0784351	0.0230471	0.0648648	0.101696	0.0856607	0.106788	0.0842285	0.172092	0.12752	0.0417455	0.0529421	0.0827586	0.124866	0.0752141	0.10105	0.070937	0.0573645	0.0774605	0.0540038	0.0904692	0.0550485	0.0353288	0.0409235	0.0650664	0.0565254
('Ozone layer depletion', 'Human health')	0.0784351	0.0230471	0.0648648	0.101696	0.0856607	0.106788	0.0842285	0.172092	0.12752	0.0417455	0.0529421	0.0827586	0.124866	0.0752141	0.10105	0.070937	0.0573645	0.0774605	0.0540038	0.0904692	0.0550485	0.0353288	0.0409235	0.0650664	0.0565254
('Particulate matter formation', 'Midpoint')	0.093183	0.0525691	0.0911449	0.11116	0.113975	0.15922	0.101327	0.133164	0.128426	0.09152	0.122862	0.116875	0.148032	0.143041	0.145919	0.126845	0.074723	0.123902	0.0983976	0.105619	0.0586765	0.196228	0.0622833	0.0894698	0.0834733
('Particulate matter formation', 'Human health')	0.093183	0.0525691	0.0911449	0.11116	0.113975	0.15922	0.101327	0.133164	0.128426	0.09152	0.122862	0.116875	0.148032	0.143041	0.145919	0.126845	0.074723	0.123902	0.0983976	0.105619	0.0586765	0.196228	0.0622833	0.0894698	0.0834733
('Photochemical ozone formation', 'Midpoint')	0.077622	0.0560967	0.0590161	0.0987165	0.119413	0.117726	0.0749597	0.0873625	0.123914	0.0970098	0.11356	0.101195	0.110765	0.12504	0.136367	0.108203	0.0764283	0.117259	0.0953768	0.0928764	0.068199	0.0585297	0.0696708	0.0837617	0.077287
('Photochemical ozone formation, ecosystem quality', 'Ecosystem quality')	0.0778788	0.0536462	0.0590414	0.0975285	0.118016	0.117094	0.0740062	0.083787	0.122104	0.104284	0.110212	0.094151	0.111451	0.123884	0.133077	0.105672	0.0738308	0.11437	0.0922499	0.0881515	0.0647489	0.0463731	0.069303	0.0821132	0.0755331
('Photochemical ozone formation, human health', 'Human health')	0.077622	0.0560967	0.0590161	0.0987165	0.119413	0.117726	0.0749597	0.0873625	0.123914	0.0970098	0.11356	0.101195	0.110765	0.12504	0.136367	0.108203	0.0764283	0.117259	0.0953768	0.0928764	0.068199	0.0585297	0.0696708	0.0837617	0.077287
('Terrestrial acidification', 'Midpoint')	0.0768697	0.0672308	0.0660552	0.147353	0.123403	0.14174	0.0541328	0.208317	0.177862	0.0997117	0.117976	0.131723	0.143715	0.147316	0.134846	0.121789	0.0750258	0.111144	0.0720507	0.0978637	0.0568792	0.142926	0.111309	0.0876745	0.125935
('Terrestrial acidification', 'Ecosystem quality')	0.0769575	0.067245	0.0659557	0.146959	0.12293	0.141432	0.0545226	0.206739	0.177288	0.0993214	0.117953	0.131461	0.14331	0.140468	0.134839	0.121723	0.0750526	0.111169	0.0721651	0.0978334	0.0568809	0.142347	0.111098	0.0875464	0.126405
('Terrestrial ecotoxicity, long term', 'Ecosystem quality')	0.0468226	0.0477543	0.0775315	0.122591	0.165595	0.114866	0.0250549	0.0840145	0.0803191	0.125143	0.0932147	0.133866	0.147481	0.130938	0.0776674	0.0504412	0.0437163	0.0705588	0.0417785	0.0510215	0.0088638	0.0508994	0.0372388	0.0727881	0.084118
('Terrestrial ecotoxicity, short term', 'Ecosystem quality')	0.0237332	0.0332992	0.0197801	0.0408597	0.045978	0.0393747	0.0102517	0.045108	0.0728701	0.0639505	0.0319628	0.0346529	0.0579214	0.0553516	0.0510479	0.02534	0.0171095	0.0428113	0.0198851	0.0194945	0.00751433	0.0415594	0.0110627	0.0320872	0.0285701
('Thermally polluted water', 'Ecosystem quality')	0.296363	0.0723177	0.0945206	0.324669	0.472255	0.597918	0.477476	0.493571	0.709219	0.266019	0.28107	0.457161	0.54543	0.317936	0.410721	0.225067	0.181575	0.230909	0.207813	0.264627	0.140444	0.668183	0.222954	0.173138	0.34788
('Water availability, freshwater ecosystem', 'Ecosystem quality')	0.134208	0.0829211	0.0955656	0.201812	0.163049	0.238	0.0438043	0.368407	0.279887	0.210284	0.163851	0.207102	0.238311	0.21389	0.225601	0.118383	0.122873	0.156003	0.163048	0.193412	0.0362753	0.179167	0.176193	0.163894	0.208865
('Water availability, human health', 'Human health')	0.134208	0.0829211	0.0955656	0.201812	0.163049	0.238	0.0438043	0.368407	0.279887	0.210284	0.163851	0.207102	0.238311	0.21389	0.225601	0.118383	0.122873	0.156003	0.163048	0.193412	0.0362753	0.179167	0.176193	0.163894	0.208865
('Water availability, terrestrial ecosystem', 'Ecosystem quality')	0.166415	0.0396666	0.102093	0.112999	0.138803	0.1817	0.0700519	0.196452	0.158331	0.131059	0.117176	0.0953945	0.116164	0.194566	0.169824	0.115379	0.100366	0.131611	0.139764	0.148056	0.0304619	0.21704	0.0781341	0.115776	0.136772
('Water scarcity', 'Midpoint')	0.134208	0.0829211	0.0955656	0.201812	0.163049	0.238	0.0438043	0.368407	0.279887	0.210284	0.163851	0.207102	0.238311	0.21389	0.225601	0.118383	0.122873	0.156003	0.163048	0.193412	0.0362753	0.179167	0.176193	0.163894	0.208865
('Total human health', 'Human health')	0.0569981	0.0200454	0.0584736	0.0917455	0.0989996	0.112887	0.0428669	0.110846	0.122034	0.0766796	0.087434	0.0754763	0.0793661	0.105052	0.115628	0.0809943	0.0618811	0.0905001	0.0746784	0.0744515	0.0381848	0.0773548	0.0363691	0.0754158	0.112579
('Total ecosystem quality', 'Ecosystem quality')	0.0424445	0.0159215	0.0497555	0.0559565	0.0872961	0.062186	0.046726	0.0356224	0.0808726	0.0599009	0.0792352	0.0756421	0.0696737	0.0680315	0.093818	0.0689847	0.05068	0.0712066	0.0754776	0.0706578	0.0391177	0.0531862	0.0206846	0.0584715	0.0865599

## Sheet: Spatialization effect per secto
	01: Crop and animal production, hunting and related service activities	02: Forestry and logging	03: Fishing and aquaculture	07: Mining of metal ores	08: Other mining and quarrying	10: Manufacture of food products	13: Manufacture of textiles	16: Manufacture of wood and of products of wood and cork, except furniture; manufacture of articles of straw and plaiting materials	17: Manufacture of paper and paper products	19: Manufacture of coke and refined petroleum products	20: Manufacture of chemicals and chemical products	22: Manufacture of rubber and plastics products	23: Manufacture of other non-metallic mineral products	24: Manufacture of basic metals	25: Manufacture of fabricated metal products, except machinery and equipment	26: Manufacture of computer, electronic and optical products	27: Manufacture of electrical equipment	28: Manufacture of machinery and equipment n.e.c.	29: Manufacture of motor vehicles, trailers and semi-trailers	30: Manufacture of other transport equipment	33: Repair and installation of machinery and equipment	35: Electricity, gas, steam and air conditioning supply	38: Waste collection, treatment and disposal activities; materials recovery	42: Civil engineering	43: Specialized construction activities
Sample size	246	37	19	65	40	75	23	116	57	51	812	22	126	139	27	102	82	127	25	32	10	24	20	55	22
('Climate change, ecosystem quality, long term', 'Ecosystem quality')	0	0	0	0	0	0	0	0	0	0	0	0	0	0	0	0	0	0	0	0	0	0	0	0	0
('Climate change, ecosystem quality, short term', 'Ecosystem quality')	0	0	0	0	0	0	0	0	0	0	0	0	0	0	0	0	0	0	0	0	0	0	0	0	0
('Climate change, human health, long term', 'Human health')	0	0	0	0	0	0	0	0	0	0	0	0	0	0	0	0	0	0	0	0	0	0	0	0	0
('Climate change, human health, short term', 'Human health')	0	0	0	0	0	0	0	0	0	0	0	0	0	0	0	0	0	0	0	0	0	0	0	0	0
('Climate change, long term', 'Midpoint')	0	0	0	0	0	0	0	0	0	0	0	0	0	0	0	0	0	0	0	0	0	0	0	0	0
('Climate change, short term', 'Midpoint')	0	0	0	0	0	0	0	0	0	0	0	0	0	0	0	0	0	0	0	0	0	0	0	0	0
('Fisheries impact', 'Ecosystem quality')	0	0	0	0	0	0	0	0	0	0	0	0	0	0	0	0	0	0	0	0	0	0	0	0	0
('Fossil and nuclear energy use', 'Midpoint')	0	0	0	0	0	0	0	0	0	0	0	0	0	0	0	0	0	0	0	0	0	0	0	0	0
('Freshwater acidification', 'Midpoint')	0.372953	0.685603	0.394449	0.552351	0.463276	0.273916	0.122431	0.279555	0.71221	0.461314	0.378599	0.348202	0.343308	0.429168	0.389743	0.252768	0.212915	0.160921	0.188814	0.358135	0.0274713	0.482451	0.0898519	0.198679	0.119403
('Freshwater acidification', 'Ecosystem quality')	0.871821	0.766033	0.932876	0.958782	0.929764	0.603142	0.46046	0.700687	0.910388	1.03819	0.68161	0.974772	0.562548	0.871208	0.593828	0.324983	0.371844	0.315131	0.391807	0.487448	0.0880491	0.66203	0.0923185	0.391848	0.213402
('Freshwater ecotoxicity', 'Midpoint')	0	0	0	0	0	0	0	0	0	0	0	0	0	0	0	0	0	0	0	0	0	0	0	0	0
('Freshwater ecotoxicity, long term', 'Ecosystem quality')	0	0	0	0	0	0	0	0	0	0	0	0	0	0	0	0	0	0	0	0	0	0	0	0	0
('Freshwater ecotoxicity, short term', 'Ecosystem quality')	0	0	0	0	0	0	0	0	0	0	0	0	0	0	0	0	0	0	0	0	0	0	0	0	0
('Freshwater eutrophication', 'Midpoint')	0.201535	0.0236944	0.166134	0.298432	0.159613	0.339065	0.288497	0.0282795	0.4899	0.347061	0.231416	0.257317	0.188542	0.280903	0.551169	0.114307	0.0951702	0.20324	0.0488273	0.195463	0.0469	0.276585	0.149193	0.138648	0.0153244
('Freshwater eutrophication', 'Ecosystem quality')	0.201535	0.0236944	0.166134	0.298432	0.159613	0.339065	0.288497	0.0282795	0.4899	0.347061	0.231416	0.257317	0.188542	0.280903	0.551169	0.114307	0.0951702	0.20324	0.0488273	0.195463	0.0469	0.276585	0.149193	0.138648	0.0153244
('Human toxicity cancer', 'Midpoint')	0	0	0	0	0	0	0	0	0	0	0	0	0	0	0	0	0	0	0	0	0	0	0	0	0
('Human toxicity cancer, long term', 'Human health')	0	0	0	0	0	0	0	0	0	0	0	0	0	0	0	0	0	0	0	0	0	0	0	0	0
('Human toxicity cancer, short term', 'Human health')	0	0	0	0	0	0	0	0	0	0	0	0	0	0	0	0	0	0	0	0	0	0	0	0	0
('Human toxicity non-cancer', 'Midpoint')	0	0	0	0	0	0	0	0	0	0	0	0	0	0	0	0	0	0	0	0	0	0	0	0	0
('Human toxicity non-cancer, long term', 'Human health')	0	0	0	0	0	0	0	0	0	0	0	0	0	0	0	0	0	0	0	0	0	0	0	0	0
('Human toxicity non-cancer, short term', 'Human health')	0	0	0	0	0	0	0	0	0	0	0	0	0	0	0	0	0	0	0	0	0	0	0	0	0
('Ionizing radiations', 'Midpoint')	0	0	0	0	0	0	0	0	0	0	0	0	0	0	0	0	0	0	0	0	0	0	0	0	0
('Ionizing radiations, ecosystem quality', 'Ecosystem quality')	0	0	0	0	0	0	0	0	0	0	0	0	0	0	0	0	0	0	0	0	0	0	0	0	0
('Ionizing radiations, human health', 'Human health')	0	0	0	0	0	0	0	0	0	0	0	0	0	0	0	0	0	0	0	0	0	0	0	0	0
('Land occupation, biodiversity', 'Midpoint')	0.119864	0.391153	0.0060143	0.0181009	0.082636	0.150053	0.0831359	0.274763	0.13827	0.0299962	0.0672321	0.0399249	0.0617365	0.0448272	0.0930514	0.0327253	0.019121	0.0199173	0.0112537	0.0142026	-0.000755697	0.139749	0.0102011	0.0187931	0.0130153
('Land occupation, biodiversity', 'Ecosystem quality')	0.119864	0.391153	0.0060143	0.0181009	0.082636	0.150053	0.0831359	0.274763	0.13827	0.0299962	0.0672321	0.0399249	0.0617365	0.0448272	0.0930514	0.0327253	0.019121	0.0199173	0.0112537	0.0142026	-0.000755698	0.139749	0.010201	0.0187931	0.0130153
('Land transformation, biodiversity', 'Midpoint')	0.159111	0.0832325	0.0314181	0.255936	0.144354	0.116167	0.0751631	0.0705905	0.118248	0.111699	0.0782925	0.0652506	0.0992675	0.154076	0.15639	0.0647401	0.0706062	0.174512	0.0724249	0.0317066	0.0481026	0.0952314	0.0389128	0.0741235	0.0770832
('Land transformation, biodiversity', 'Ecosystem quality')	0.159111	0.0832325	0.0314181	0.255936	0.144354	0.116167	0.0751631	0.0705905	0.118248	0.111699	0.0782925	0.0652506	0.0992675	0.154076	0.15639	0.0647401	0.0706061	0.174512	0.0724249	0.0317066	0.0481026	0.0952314	0.0389128	0.0741235	0.0770832
('Marine acidification, long term', 'Ecosystem quality')	0	0	0	0	0	0	0	0	0	0	0	0	0	0	0	0	0	0	0	0	0	0	0	0	0
('Marine acidification, short term', 'Ecosystem quality')	0	0	0	0	0	0	0	0	0	0	0	0	0	0	0	0	0	0	0	0	0	0	0	0	0
('Marine ecotoxicity, long term', 'Ecosystem quality')	0	0	0	0	0	0	0	0	0	0	0	0	0	0	0	0	0	0	0	0	0	0	0	0	0
('Marine ecotoxicity, short term', 'Ecosystem quality')	0	0	0	0	0	0	0	0	0	0	0	0	0	0	0	0	0	0	0	0	0	0	0	0	0
('Marine eutrophication', 'Midpoint')	0.223049	0.345656	0.207657	0.175146	0.225208	0.177187	0.0901876	0.199563	0.14135	0.101978	0.0793982	0.0957158	0.148349	0.111579	0.090686	0.0792201	0.0513612	0.063996	0.035507	0.0414658	0.0491479	0.184287	0.068242	0.043572	0.102987
('Marine eutrophication', 'Ecosystem quality')	0.223049	0.345656	0.207657	0.175146	0.225208	0.177187	0.0901876	0.199563	0.14135	0.101978	0.0793982	0.0957159	0.148349	0.111579	0.090686	0.0792201	0.0513612	0.063996	0.035507	0.0414658	0.0491479	0.184287	0.068242	0.043572	0.102987
('Mineral resources use', 'Midpoint')	0	0	0	0	0	0	0	0	0	0	0	0	0	0	0	0	0	0	0	0	0	0	0	0	0
('Ozone layer depletion', 'Midpoint')	0	0	0	0	0	0	0	0	0	0	0	0	0	0	0	0	0	0	0	0	0	0	0	0	0
('Ozone layer depletion', 'Human health')	0	0	0	0	0	0	0	0	0	0	0	0	0	0	0	0	0	0	0	0	0	0	0	0	0
('Particulate matter formation', 'Midpoint')	0.336847	0.406871	0.247572	0.177378	0.432276	0.257079	0.268534	0.351802	0.27524	0.220091	0.223604	0.347389	0.339703	0.255786	0.256234	0.129405	0.129889	0.173394	0.12982	0.121455	0.0414458	0.306438	0.114867	0.148809	0.163836
('Particulate matter formation', 'Human health')	0.336847	0.406871	0.247572	0.177378	0.432276	0.257079	0.268534	0.351802	0.27524	0.220091	0.223604	0.347389	0.339703	0.255786	0.256234	0.129405	0.129889	0.173394	0.12982	0.121455	0.0414458	0.306438	0.114867	0.148809	0.163836
('Photochemical ozone formation', 'Midpoint')	0	0	0	0	0	0	0	0	0	0	0	0	0	0	0	0	0	0	0	0	0	0	0	0	0
('Photochemical ozone formation, ecosystem quality', 'Ecosystem quality')	0	0	0	0	0	0	0	0	0	0	0	0	0	0	0	0	0	0	0	0	0	0	0	0	0
('Photochemical ozone formation, human health', 'Human health')	0	0	0	0	0	0	0	0	0	0	0	0	0	0	0	0	0	0	0	0	0	0	0	0	0
('Terrestrial acidification', 'Midpoint')	0.484779	0.355085	0.457022	0.318835	0.409785	0.348657	0.275476	0.314511	0.34176	0.334854	0.246456	0.316099	0.20896	0.360468	0.226959	0.215648	0.168574	0.22229	0.123854	0.148475	0.0881542	0.378607	0.0347055	0.129362	0.185553
('Terrestrial acidification', 'Ecosystem quality')	0.380062	0.29077	0.409033	0.298389	0.335246	0.253713	0.232603	0.242776	0.296884	0.316783	0.211377	0.254801	0.187055	0.27326	0.233737	0.209411	0.169334	0.149094	0.126078	0.104993	0.162235	0.340397	0.027559	0.114872	0.113788
('Terrestrial ecotoxicity, long term', 'Ecosystem quality')	0	0	0	0	0	0	0	0	0	0	0	0	0	0	0	0	0	0	0	0	0	0	0	0	0
('Terrestrial ecotoxicity, short term', 'Ecosystem quality')	0	0	0	0	0	0	0	0	0	0	0	0	0	0	0	0	0	0	0	0	0	0	0	0	0
('Thermally polluted water', 'Ecosystem quality')	0	0	0	0	0	0	0	0	0	0	0	0	0	0	0	0	0	0	0	0	0	0	0	0	0
('Water availability, freshwater ecosystem', 'Ecosystem quality')	0	0	0	0	0	0	0	0	0	0	0	0	0	0	0	0	0	0	0	0	0	0	0	0	0
('Water availability, human health', 'Human health')	-0.0147965	-0.0175303	0.053331	0.0231849	0.019771	-0.00984633	0.113651	-0.229667	-0.123549	-0.0360899	0.00143705	0.000960039	-0.0155349	-0.0427143	-0.0557157	-0.0646767	-0.0613681	-0.0370466	-0.0590664	-0.0643532	-0.0248294	-0.0298803	-0.123888	-0.032672	-0.159156
('Water availability, terrestrial ecosystem', 'Ecosystem quality')	0.277909	0.0176508	0.0395116	0.394705	0.361396	0.291438	0.179716	0.13708	0.273397	0.0898993	0.171156	0.308224	0.341175	0.214553	0.149469	0.0796075	0.0499549	0.0778028	0.237994	0.0390368	0.0142845	0.344494	0.09026	0.0879075	0.133613
('Water scarcity', 'Midpoint')	0.361504	0.0115702	0.12504	0.164194	0.263308	0.13275	0.194043	-0.129174	0.0220906	0.189632	0.0781322	0.115562	0.0591486	0.0781396	-0.0186405	-0.0188888	-0.00679529	0.00240482	-0.0296847	-0.0335874	0.00331477	0.110913	-0.0020325	0.0644441	-0.0441611
('Total human health', 'Human health')	0.0512269	0.0861915	0.0459311	0.00415348	0.104391	0.0311644	0.104895	0.0760879	0.0916184	0.014329	0.0388904	0.0393235	0.0343302	0.0581705	0.0567543	0.0317337	0.0151148	0.0181136	0.0207157	0.01378	0.0037641	0.123276	0.0541911	0.0104535	0.0215802
('Total ecosystem quality', 'Ecosystem quality')	0.0545163	0.132543	0.0170168	0.0395088	0.0793089	0.0340992	0.0652966	0.0981109	0.0851362	0.0190858	0.0257384	0.0301068	0.0200924	0.0712371	0.038481	0.0321914	0.0243562	0.029457	0.00204619	0.00841059	-0.00725497	0.103185	0.0679678	0.0143642	0.0450225

## Sheet: ecoinvent_to_HS_mapping
ecoinvent	HS
[sulfonyl]urea-compound	2935
[thio]carbamate-compound	293090
1,1-difluoroethane	290343
1,1-dimethylcyclopentane	290219
1,4-butanediol	290539
1-butanol	290513
1-methoxy-2-propanol	290949
1-methylcyclopropene	290919
1-naphthylacetic acid	291639
1-pentanol	290519
1-propanol	290512
2,3-dimethylbutane	290110
2,4-dichlorophenol	290819
2,4-dichlorotoluene	290399
2,4-dinitrotoluene	290420
2,4-di-tert-butylphenol	290719
2,5-dimethylhexane-2,5-dihydroperoxide	290960
2,6-di-tert-butylphenol	290719
2-butanol	290513
2-cyclopentanone	291429
2-methyl-1-butanol	290519
2-methyl-2-butanol	290519
2-methylpentane	290110
2-nitroaniline	292142
2-pyridinol	293339
3-methyl-1-butanol	290519
3-methyl-1-butyl acetate	291533
3-methylpyridine	293331
4-methyl-2-pentanone	291413
4-tert-butylbenzaldehyde	291229
4-tert-butyltoluene	290290
6-benzyladenine	293399
absorption chiller, 100kW	841869
acetaldehyde	291212
acetamide-anillide-compound, unspecified	292419
acetanilide	292419
acetic acid, without water, in 98% solution state	291521
acetic anhydride	291524
acetoacetic acid	291830
acetone cyanohydrin	292690
acetone, liquid	291411
acetonitrile	292690
acetyl chloride	291590
acetylene	290129
aclonifen	380893
acrolein	291219
acrylic acid	291611
acrylic binder, with water, in 54% solution state	390690
acrylic dispersion, with water, in 58% solution state	390690
acrylic filler	321410
acrylic varnish, with water, in 53% solution state	320910
acrylonitrile	292610
acrylonitrile-butadiene-styrene copolymer	390330
activated bentonite	250810
activated carbon, granular	380210
activated silica	281122
adhesive mortar	382450
adhesive, for metal	350691
adipic acid	291712
adiponitrile	292690
adobe brick	681099
agricultural machinery, tillage	843229
agricultural machinery, unspecified	843680
agricultural trailer	871620
air compressor, screw-type compressor, 300kW	841480
air compressor, screw-type compressor, 4kW	841480
air distribution terminal panel, steel, 120 m3/h	730890
air filter, central unit, 600 m3/h	842139
air filter, decentralized unit, 180-250 m3/h	842139
air filter, decentralized unit, 250 m3/h	842139
air filter, in exhaust air valve	842139
air input/output unit, heat and power co-generation unit, 160kW electrical	841989
aircraft, agricultural	880230
aircraft, belly freight, long haul	880240
aircraft, belly freight, medium haul	880230
aircraft, belly freight, short haul	880230
aircraft, belly freight, very short haul	880220
aircraft, dedicated freight, long haul	880240
aircraft, dedicated freight, medium haul	880230
aircraft, dedicated freight, short haul	880230
aircraft, dedicated freight, very short haul	880220
aircraft, passenger, long haul	880240
aircraft, passenger, medium haul	880230
aircraft, passenger, short haul	880230
aircraft, passenger, very short haul	880220
alfalfa-grass silage	121490
alkyd paint, white, without solvent, in 60% solution state	320810
alkyd paint, white, without water, in 60% solution state	320810
alkyd resin, long oil, without solvent, in 70% white spirit solution state	390750
alkyl sulphate (C12-14)	340211
alkylbenzene sulfonate, linear, petrochemical	340211
alkylbenzene, linear	290290
alkylketene dimer sizing agent, for paper production	380992
allyl chloride	290329
almond	080212
alpha-naphthol	290715
alpha-picoline	293331
aluminium alloy, AlLi	760120
aluminium alloy, AlMg3	760120
aluminium alloy, metal matrix composite	760120
aluminium around steel bi-metal stranded cable, 3x3.67mm external diameter wire	761490
aluminium around steel bi-metal wire, 3.67mm external diameter	761490
aluminium chloride	282732
aluminium collector foil, for Li-ion battery	760711
aluminium fluoride	282612
aluminium hydroxide	281830
aluminium melting furnace	841710
aluminium oxide, metallurgical	281820
aluminium oxide, non-metallurgical	281810
aluminium sulfate, powder	283322
aluminium sulfate, without water, in 4.33% aluminium solution state	283322
aluminium, cast alloy	760120
aluminium, primary, cast alloy slab from continuous casting	760120
aluminium, primary, ingot	760110
aluminium, primary, liquid	760110
aluminium, wrought alloy	760429
amidosulfuron	380893
amine oxides	292159
aminopyridine	293331
ammonia, anhydrous, liquid	281410
ammonium bicarbonate	283699
ammonium carbonate	283699
ammonium chloride	282710
ammonium nitrate	310230
ammonium nitrate phosphate	310551
ammonium nitrite	283410
ammonium paratungstate	284180
ammonium sulfate	310221
ammonium thiocyanate	284290
anhydrite	252010
anhydrite floor	680990
anhydrite rock	252010
anhydrite, burned	252020
aniline	292142
anionic resin	391400
anode, for metal electrolysis	854590
anode, graphite, for Li-ion battery	854590
anode, paste, for aluminium electrolysis	854519
anode, prebake, for aluminium electrolysis	854519
anode, silicon coated graphite, for Li-ion battery	854590
anthranilic acid	292243
antimony	811010
anti-reflex-coating, etching, solar glass	700719
apple	080810
apricot	080910
argon, crude, liquid	280421
argon, liquid	280421
arsine	285000
asbestos, chrysotile type	252490
ascorbic acid	293627
asparagus seedling, for planting	060290
atrazine	380893
aubergine	070930
autoclaved aerated concrete block	681011
auxiliary heating unit, electric, 5kW	851629
avocado	080440
azodicarbonamide	292700
backlight, for liquid crystal display	901380
bagasse, from sugarcane	230320
bagasse, from sweet sorghum	230320
bamboo pole	140110
banana	080390
barge	890190
barge tanker	890120
barite	251110
barium carbonate	283660
barium hydroxide	281640
barium oxide	281640
barium sulfide	283090
bark	140490
bark chips, wet, measured as dry mass	440140
barley grain	100390
barley grain, feed	100390
barley grain, feed, organic	100390
barley grain, organic	100390
barley seed, for sowing	100310
barley seed, organic, for sowing	100310
basalt	251690
base oil	271000
base plaster	252020
battery cell, Li-ion, LFP	850760
battery cell, Li-ion, LiMn2O4	850760
battery cell, Li-ion, NCA	850760
battery cell, Li-ion, NMC111	850760
battery cell, Li-ion, NMC811	850760
battery management system, for Li-ion battery	853710
battery module packaging, Li-ion	850790
battery separator	850790
battery, lead acid, rechargeable, stationary	850720
battery, Li-ion, LFP, rechargeable, prismatic	850760
battery, Li-ion, LiMn2O4, rechargeable, prismatic	850760
battery, Li-ion, NCA, rechargeable, prismatic	850760
battery, Li-ion, NMC111, rechargeable, prismatic	850760
battery, Li-ion, NMC811, rechargeable, prismatic	850760
battery, NaCl	850780
battery, NiMH, rechargeable, prismatic	850750
bauxite	260600
bell pepper	070960
bentonite	250810
benzal chloride	290399
benzaldehyde	291221
benzaldehyde-2-sulfonic acid	291249
benzene	290220
pyrolysis gas, containing benzene, toluene and xylene	290220
benzimidazole-compound	380893
benzo[thia]diazole-compound	380893
benzoic acid	291631
benzoic-compound	291631
benzyl alcohol	290621
benzyl chloride	290399
beryllium	811212
beryllium hydroxide	282590
bicycle	871200
biogas	271129
biogas, from grass	271129
biomethane, high pressure	271129
biomethane, high pressure, vehicle grade	271129
biomethane, low pressure	271129
biomethane, low pressure, vehicle grade	271129
biomethane, medium pressure, vehicle grade	271129
bipyridylium-compound	380893
bisphenol A epoxy based vinyl ester resin	390730
bisphenol A, powder	290723
bitumen adhesive compound, cold	271500
bitumen adhesive compound, hot	271500
bitumen seal	271500
bitumen seal, Alu80	271500
bitumen seal, polymer EP4 flame retardant	271500
bitumen seal, V60	271500
bitumen seal, VA4	271500
bleach	282890
blower and heat exchange unit, Avent E 97	841510
blower and heat exchange unit, central, 600-1200 m3/h	841510
blower and heat exchange unit, decentralized, 180-250 m3/h	841510
blower and heat exchange unit, GE 250 RH	841510
blower and heat exchange unit, KWL 250	841510
blower and heat exchange unit, KWLC 1200	841510
blower and heat exchange unit, Storkair G 90	841510
blower and heat exchange unit, Twl-700	841510
borax, anhydrous, powder	284011
borehole heat exchanger, 150m	841950
boric acid, anhydrous, powder	281000
boric oxide	281000
boron carbide	284990
boron trifluoride	282690
brass	740321
brazing solder, cadmium free	831190
breadcrumbs	190590
broccoli	070410
bromine	280130
bromopropane	290339
bromoxynil	380893
bronze	740322
building machine	842952
bulk lead-zinc concentrate	260700
bundle, energy wood, measured as dry mass	440139
bus	8702
butadiene	271114
butadiene, crude	271114
butane	290110
butene, mixed	290123
butter, from cow milk	040510
buttermilk, from cow milk	040390
butyl acetate	291533
butyl acrylate	291612
butyldiglycol acetate	290949
butyrolactone	293220
C3 hydrocarbon mixture	271119
cabbage red	070490
cabbage white	070490
cable, connector for computer, without plugs	854442
cable, data cable in infrastructure	854470
cable, network cable, category 5, without plugs	854449
cable, printer cable, without plugs	854449
cable, ribbon cable, 20-pin, with plugs	854442
cable, three-conductor cable	854449
cable, unspecified	854449
cadmium	810720
cadmium chloride, semiconductor-grade	282739
cadmium sulfide, semiconductor-grade	283090
cadmium telluride, semiconductor-grade	285390
cadmium, semiconductor-grade	810720
calcareous marl	252100
calcined clay	250700
calcium ammonium nitrate	310230
calcium borates	252800
calcium carbide, technical grade	284910
calcium carbonate, precipitated	283650
calcium chloride	282720
calcium nitrate	310260
capacitor, auxilliaries and energy use	853210
capacitor, electrolyte type, < 2cm height	853222
capacitor, electrolyte type, > 2cm height	853222
capacitor, film type, for through-hole mounting	853225
capacitor, for surface-mounting	853230
capacitor, tantalum-, for through-hole mounting	853221
captan	380892
carbon black	280300
carbon dioxide, liquid	281121
carbon disulfide	281310
carbon fibre reinforced plastic, injection moulded	391690
carbon monoxide	281129
carbon tetrachloride	290314
carboxymethyl cellulose, powder	391231
carrot	070610
carrot seed, for sowing	120929
carton board box production, with gravure printing	481920
carton board box production, with offset printing	481920
cashew	080132
cast iron	7207
castor bean	120730
catalytic converter, oxidation, 20 litre	842139
catalytic converter, selective catalytic reduction, 200 litre	842139
catalytic converter, three-way, 19.1l	842139
catalytic converter, three-way, mini CHP plant	842139
cathode, for aluminium electrolysis	854519
cathode, LFP, for Li-ion battery	850790
cathode, LiMn2O4, for Li-ion battery	850790
cathode, NCA, for Li-ion battery	850790
cathode, NMC111, for Li-ion battery	850790
cathode, NMC811, for Li-ion battery	850790
cathode-ray tube, cathode ray tube display	854011
cationic resin	391400
cattle for slaughtering, live weight	010229
cauliflower	070410
celery	070940
cellulose fibre	530310
cement cast plaster floor	681019
cement mortar	382450
cement plaster	382450
cement tile	681019
cement, ART	252330
cement, CEM II/A	252329
cement, CEM II/A-L	252329
cement, CEM II/A-S	252329
cement, CEM II/A-V	252329
cement, CEM II/B	252329
cement, CEM II/B-L	252329
cement, CEM II/B-S	252329
cement, CEM II/B-V	252329
cement, CEM III/A	252390
cement, CEM III/B	252390
cement, CEM III/C	252390
cement, CEM IV/A	252390
cement, CEM IV/B	252390
cement, CEM V/A	252390
cement, CEM V/B	252390
cement, CP II-E	252329
cement, CP II-F	252329
cement, CP III	252390
cement, CP II-Z	252329
cement, CP IV	252390
cement, CP V RS	252330
cement, Portland	252329
cement, Portland SR3	252329
cement, Portland Slag	252390
cement, Pozzolana Portland	252390
cement, type general use	252329
cement, type I (SM)	252329
cement, type ICo	252329
cement, type IP	252390
cement, type IP/P	252390
cement, type I-PM	252390
cement, type IS	252390
cement, type S	252390
cement, unspecified	252329
ceramic tile	690510
cerium oxide	284610
charcoal	4402
charger, electric passenger car	850440
charger, for electric scooter	850440
cheese, from cow milk, fresh, unripened	040610
chemical, inorganic	281511
chemical, organic	290220
chemi-thermomechanical pulp	470319
chicken for slaughtering, live weight	010511
chickpea	071320
chilli	090421
chloridazon	380893
chlorine dioxide	281129
chlorine, gaseous	280110
chlorine, liquid	280110
chlormequat chloride	380893
chloroacetic acid	291540
chloroacetyl chloride	291590
chlorodifluoromethane	290349
chloromethyl methyl ether	290919
chloronitrobenzene	290499
chloropropionic acid	291550
chlorosulfonic acid	280620
chlorothalonil	380892
chlorotoluron	380893
chlorpropham	380893
chromite ore concentrate	261000
chromium	811221
chromium trioxide, flakes	281990
chromium steel pipe	730449
clay	2508
clay brick	690100
clay plaster	680990
cleaning consumables, without water, in 13.6% solution state	340220
cleft timber, measured as dry mass	440420
clinker	252310
coal gas	270500
coal stove, 5-15kW	732189
coal tar	270600
coating powder	320810
cobalt	810520
cobalt acetate	291529
cobalt carbonate	283699
cobalt hydroxide	282200
cobalt oxide	282200
cobalt sulfate	283329
cocamide diethanolamine	382499
cocoa bean	180100
coconut oil, crude	151311
coconut, dehusked	080119
coffee maker	851671
coffee, green bean	090111
coke	270400
compact fluorescent lamp	853931
compressed air, 1000 kPa gauge	285390
compressed air, 1200 kPa gauge	285390
compressed air, 600 kPa gauge	285390
compressed air, 700 kPa gauge	285390
compressed air, 800 kPa gauge	285390
computer, desktop, without screen	847141
computer, laptop	847130
concrete block	681011
concrete roof tile	681019
concrete slab	681019
concrete, 20MPa	382450
concrete, 25-30MPa	382450
concrete, 25MPa	382450
concrete, 30-32MPa	382450
concrete, 30MPa	382450
concrete, 35MPa	382450
concrete, 37MPa	382450
concrete, 40MPa	382450
concrete, 45MPa	382450
concrete, 50MPa	382450
concrete, medium strength	382450
concrete, normal strength	382450
container ship	890190
container, for collection of post-consumer waste plastic for recycling	392390
containerboard, fluting medium	480591
containerboard, linerboard	480411
containerboard, unspecified	480591
control cabinet, heat and power co-generation unit, 160kW electrical	853710
controller, for electric scooter	854370
conveyor belt	4010
cookstove	7321
copper cake	740200
copper carbonate	283699
copper collector foil, for Li-ion battery	741011
copper concentrate, sulfide ore	260300
copper oxide	282550
copper sulfate	283325
copper, anode	740200
copper, cathode	740311
copper-rich materials	740200
core board	480591
coriander	090921
cork slab	450490
cork, raw	450110
corrugated board box	481910
cottonseed	120729
cottonseed meal	230610
cottonseed oil, crude	151221
cottonseed oil, refined	151229
cottonseed, for sowing	120729
cottonseed, organic	120729
cottonseed, organic, for sowing	120729
cover plaster, mineral	680990
cover plaster, organic	321490
cow milk	040120
cream, from cow milk	040140
cross-laminated timber	441299
cryolite	253090
cucumber	070700
cumene	290270
cyanoacetic acid	292690
cyanogen chloride	281290
cyanuric chloride	293369
cyclic N-compound	293399
cyclohexane	290211
cyclohexanol	290612
cyclohexanone	291422
daminozide	380893
decabromodiphenyl ether	290930
de-icer	382499
deinked pulp, wet lap	470620
deinking emulsion, in paper production	340290
demersal fish, fresh	030289
diammonium phosphate	310530
diazine-compound	293339
diazole-compound	293339
diborane	285000
dichlobenil	380893
dichloromethane	290312
1,3-dichloropropene	290329
dicyclopentadiene based unsaturated polyester resin	390791
diesel	271000
diesel, low-sulfur	271000
diethanolamine	292212
diethyl ether, without water, in 99.95% solution state	290911
diethylene glycol	290944
dimethenamide	380893
dimethyl carbonate	292090
dimethyl ether	290919
dimethyl hexanediol	290539
dimethyl hexynediol	290529
dimethyl malonate	291719
dimethyl sulfate	292090
dimethyl sulfide	293090
dimethyl sulfoxide	293090
dimethylacetamide	292419
dimethylamine	292111
dimethylamine borane	285000
dimethylaminopropylamine	292119
dimethyldichlorosilane	294000
dinitroaniline-compound	292143
dinitrogen tetroxide	281129
dioctyl adipate	291712
dioctyl terephthalate	291739
diode, auxilliaries and energy use	854110
diode, glass-, for surface-mounting	854110
diode, glass-, for through-hole mounting	854110
dioxane	293299
diphenylether-compound	290930
dipropyl amine	292119
dipropylene glycol monomethyl ether	290949
dishwasher	842211
disk drive, CD/DVD, ROM, for desktop computer	847170
disk drive, CD/DVD, ROM, for laptop computer	847170
disodium disulphite	283220
display, cathode ray tube, 17 inches	852842
display, liquid crystal, 17 inches	852852
dithiocarbamate-compound	293090
dodecanol	290517
dolomite	251810
door, inner, glass-wood	441820
door, inner, wood	441820
door, outer, wood-aluminium	441820
door, outer, wood-glass	441820
dryer	842112
DTPA, diethylenetriaminepentaacetic acid	292129
dust collector, electrostatic precipitator, for domestic use	850440
dust collector, electrostatic precipitator, for industrial use	850440
dust collector, multicyclone	842139
dysprosium oxide	284690
EDTA, ethylenediaminetetraacetic acid	292249
electric bicycle	871160
electric connector, peripheral component interconnect buss	853690
electric connector, peripheral type buss	853690
electric connector, wire clamp	853690
electric kettle	851679
electric motor, electric passenger car	8501
electric motor, for electric scooter	8501
electric motor, vehicle	8501
electric scooter, without battery	871160
electrode, negative, LiC6	854590
electrode, negative, Ni	850790
electrode, positive, LaNi5	850790
electrolyte, for Li-ion battery	382499
electrolyte, for solid oxide fuel cell	382499
electrolyte, KOH, LiOH additive	382499
electrolyte, nickel-rich	382499
electron gun, for cathode ray tube display	854091
electronic component machinery, unspecified	847989
electronic component, active, unspecified	854190
electronic component, passive, unspecified	853290
electronics, for control units	8537
electrostatic paint	3208
enriched uranium, 4.2%	284420
enzymes	350790
epichlorohydrin	291030
epoxy resin insulator, Al2O3	854720
epoxy resin insulator, SiO2	854720
epoxy resin, liquid	390730
erbium oxide	284690
esterquat	340290
ethane	271121
ethanol, without water, in 95% solution state, from fermentation	220710
ethanol, without water, in 99.7% solution state, from ethylene	290519
ethanol, without water, in 99.7% solution state, from fermentation	220710
ethanol, without water, in 99.7% solution state, from fermentation, vehicle grade	220720
ethephon	380893
ethoxylated alcohol (AE>20)	340213
ethoxylated alcohol (AE11)	340213
ethoxylated alcohol (AE3)	340213
ethoxylated alcohol (AE7)	340213
ethyl acetate	291531
ethyl benzene	290260
ethyl tert-butyl ether	290919
ethylamine	292119
ethylene	271114
ethylene bromide	290339
ethylene carbonate	293299
ethylene dichloride	290315
ethylene glycol	290531
ethylene glycol diethyl ether	290949
ethylene glycol dimethyl ether	290949
ethylene glycol monoethyl ether	290949
ethylene oxide	291010
ethylene vinyl acetate copolymer	390130
ethylene diamine	292121
ethylvinylacetate, foil	392010
EUR-flat pallet	441520
europium oxide	284690
exhaust air outlet, steel/aluminium, 85x365 mm	730729
exhaust air roof hood, steel, DN 400	730890
exhaust air valve, in-wall housing, plastic/steel, DN 125	848180
expanded clay	681099
expanded perlite	680620
expanded vermiculite	680620
expansion vessel, 25l	848180
expansion vessel, 80l	848180
explosive, tovex	360200
fatty acid	3823
fatty acid methyl ester	382600
fatty alcohol	382370
fatty alcohol sulfate	340211
fava bean	071350
fava bean seed, for sowing	120929
fava bean seed, organic, for sowing	120929
fava bean, organic	071350
fennel	090961
ferrochromium, high-carbon, 55% Cr	720241
ferrochromium, high-carbon, 68% Cr	720241
ferromanganese, high-coal, 74.5% Mn	720211
ferronickel	720260
ferroniobium, 66% Nb	720293
ferrosilicon	720221
ferry	890110
fibre cement corrugated slab	681181
fibre cement facing tile	681182
fibre cement facing tile, large format	681182
fibre cement facing tile, small format	681182
fibre cement roof slate	681182
fibre, cotton	520100
fibre, cotton, organic	520100
fibre, flax	530110
fibre, jute	530310
fibre, kenaf	530310
fibre, polyester	550320
fibreboard, hard	441192
fibreboard, soft	441194
fibreboard, soft, latex bonded	441194
fibreboard, soft, without adhesives	441194
fibre-reinforced concrete, steel	681099
fish block, hake	030474
fish oil, from anchovy	150420
fishmeal, 63-65% protein	230120
fishmeal, 65-67% protein	230120
flat glass, coated	7005
flat glass, uncoated	7005
flat plate solar collector, Cu absorber	841919
flattened bamboo	140110
flax husks	230800
flax plant, harvested	530110
fleece, polyethylene	560314
flexible duct, aluminium/PET, DN of 125	760820
floating collar cage	890790
floating hexagonal metal cage	890790
fluazifop-butyl	380893
fluorescent whitening agent, DAS1, triazinylaminostilben type	320420
fluorescent whitening agent, distyrylbiphenyl type	320420
fluorine, liquid	280130
fluorspar, 97% purity	252921
fluosilicic acid, without water, in 22% solution state	281119
flux, for wave soldering	381010
flyash brick	681599
foam glass	701690
foaming agent	382499
fodder beet seed, for sowing	120910
fodder yeast	230990
folding boxboard carton	481920
folpet	380892
formaldehyde	291211
formic acid	291511
fosetyl-Al	380892
fraction 1 from naphtha separation	271000
fraction 7 from naphtha separation	271000
fraction 8 from naphtha separation	271000
frit, for cathode ray tube display	320740
frit, for ceramic tile	320740
frozen fish sticks, hake	160420
fruit tree seedling, for planting	060220
fuel cell, polymer electrolyte membrane, 2kW electrical, future	850162
fuel cell, solid oxide, 125kW electrical, future	850163
fuel cell, solid oxide, with micro gas turbine, 180kW electrical, future	850163
fuel cell, stack polymer electrolyte membrane, 2kW electrical, future	850162
fuel cell, stack solid oxide, 125kW electrical, future	850163
funnel glass, for cathode ray tube display	701120
furnace, logs, 30kW	841780
furnace, logs, 6kW	841780
furnace, logs, average storage area, 100kW	841780
furnace, logs, average storage area, 30kW	841780
furnace, logs, average storage area, 6kW	841780
furnace, logs, hardwood storage area, 100kW	841780
furnace, logs, hardwood storage area, 30kW	841780
furnace, logs, hardwood storage area, 6kW	841780
furnace, logs, softwood storage area, 100kW	841780
furnace, logs, softwood storage area, 30kW	841780
furnace, logs, softwood storage area, 6kW	841780
furnace, pellet, 15kW	841620
furnace, pellet, 50kW	841620
furnace, pellets, 25kW	841620
furnace, pellets, 9kW	841620
furnace, pellets, with silo, 300kW	841620
furnace, wood chips, average storage area, 1000kW	841780
furnace, wood chips, average storage area, 300kW	841780
furnace, wood chips, average storage area, 50kW	841780
furnace, wood chips, hardwood storage area, 1000kW	841780
furnace, wood chips, hardwood storage area, 300kW	841780
furnace, wood chips, hardwood storage area, 50kW	841780
furnace, wood chips, softwood storage area, 1000kW	841780
furnace, wood chips, softwood storage area, 300kW	841780
furnace, wood chips, softwood storage area, 50kW	841780
furnace, wood chips, with silo, 1000kW	841780
furnace, wood chips, with silo, 300kW	841780
furnace, wood chips, with silo, 5000kW	841780
furnace, wood chips, with silo, 50kW	841780
furniture, wooden	940360
gadolinium oxide	284690
gallium, semiconductor-grade	811292
gas boiler	840310
gas motor, 206kW	840790
gas motor, mini CHP plant	840790
gas turbine, 10MW electrical	841182
gas turbine, 80MW, for compressed air energy storage	841182
generator, 200kW electrical	850162
generator, mini CHP plant	850163
glass fibre	7019
glass fibre reinforced plastic, polyamide, injection moulded	392690
glass fibre reinforced plastic, polyester resin, hand lay-up	392590
glass tube, borosilicate	701720
glass wool mat	701931
glass, for liquid crystal display	701190
glider, for electric scooter	871410
glider, passenger car	870710
glucose	170230
glued laminated timber, average glue mix	4412
glued laminated timber, MUF-glue	4412
glued laminated timber, PUR-glue	4412
glued solid timber	4412
gluing mill	847989
glycerine	290545
glycine	292249
glyoxal	291219
glyphosate	380893
gold	710812
gold, unrefined	710812
gold-silver, ingot	710812
goods wagon	8606
grape	080610
graphic paper, 100% recycled	480254
graphite	2504
synthetic graphite, battery grade	380110
grass fibre	530390
grass seed, organic, for sowing	120929
grass silage, organic	121490
grass, organic	121490
gravel, crushed	251710
gravel, round	251710
green asparagus	070920
greenhouse, glass walls and roof	940690
gypsum fibreboard	680919
gypsum plasterboard	680919
gypsum, mineral	252010
hafnium sponge	811292
hafnium tetrachloride	284690
hair dryer	851631
hard chromium coat, electroplating, steel substrate, 0.14 mm thickness	320890
hard coal	270112
hard coal briquettes	270120
hard coal, run-of-mine	270112
hard disk drive, for desktop computer	847170
hard disk drive, for laptop computer	847170
hay	121490
hay, organic, intensive	121490
heat and power co-generation unit, 1MW electrical, components for electricity only	850300
heat and power co-generation unit, 500kW electrical, components for electricity only	850300
heat and power co-generation unit, 6400kW thermal, components for electricity only	850300
heat carrier liquid, 40% C3H8O2	290532
heat distribution equipment, hydronic radiant floor heating, 150m2	841950
heat pump, 30kW	841861
heat pump, brine-water, 10kW	841861
heat pump, diffusion absorption, 4kW, future	841861
heat pump, for mini CHP plant	841861
heat pump, heat and power co-generation unit, 160kW electrical	841861
heat storage, 2000l	841990
heat, air-water heat pump 10kW	841861
heat, brine-water heat pump 10kW	841861
heavy fuel oil	271000
heavy water	284510
helicopter	880211
helium	280429
helium, crude	280429
heptane	290110
hexafluoroethane	290339
hexamethyldisilazane	293190
hexamethylene-1,6-diisoncyanate	292910
hexamethylenediamine	292122
hexane	290110
high voltage system, for Li-ion battery	850790
holmium oxide	284690
horn meal	230990
horticultural fleece	560314
hot water tank, 600l	841990
hydraulic digger	842952
hydraulic fracturing fluid	382499
hydrazine	282510
hydrazine sulfate	282510
hydrochloric acid, without water, in 30% solution state	280610
hydrogen cyanide	281112
hydrogen fluoride	281111
hydrogen peroxide, without water, in 50% solution state	284700
hydrogen sulfide	281390
hydrogen, gaseous, low pressure	280410
hydrogen, gaseous, medium pressure, merchant	280410
hydroquinone	290722
hydroxylamine	282510
iceberg lettuce	070511
ilmenite, 54% titanium dioxide	261400
imidazole	293329
indium	811292
indium tin oxide powder, nanoscale, for sputtering target	382499
indolylbutyric acid	293399
inductor, auxilliaries and energy use	850450
inductor, low value multilayer chip	850450
inductor, miniature radio frequency chip	850450
inductor, ring core choke type	850450
industrial furnace, 1MW, oil	841780
industrial furnace, coal, 1-10MW	841780
industrial furnace, natural gas	841780
industrial machine, heavy, unspecified	847989
inert filler	382499
inert gas for discharge lamps	280421
inorganic nitrogen fertiliser, as N	3102
inorganic phosphorus fertiliser, as P2O5	3103
inorganic potassium fertiliser, as K2O	3104
insulated gate bipolar transistor, electric vehicle application	854129
insulation spiral-seam duct, rockwool, DN 400, 30 mm	680610
integrated battery interface system, for Li-ion battery	850760
integrated circuit, logic type	854239
integrated circuit, memory type	854232
intermodal shipping container, 20-foot	860900
intermodal shipping container, 40-foot	860900
intermodal shipping container, 40-foot, high-cube	860900
intermodal shipping container, 45-foot, high-cube	860900
internal combustion engine, passenger car	840733
internet access equipment	851762
intral	250200
inverter, 0.5kW	850440
inverter, 2.5kW	850440
inverter, 500kW	850440
inverter, for electric passenger car	850440
iodine	280120
ion-exchanger for water treatment	842121
ioxynil	380893
iron(III) chloride, without water, in 40% solution state	282739
iron ore concentrate	260111
iron ore, crude ore, 46% Fe	260111
iron ore, crude ore, 63% Fe	260111
iron pellet	260112
iron sinter	260112
iron sulfate	283329
iron(II) chloride	282739
iron(III) chloride, without water, in 14% iron solution state	282739
iron(III) chloride, without water, in a 12% iron solution state	282739
iron(III) sulfate, without water, in 12.5% iron solution state	283329
iron-nickel-chromium alloy	722599
isobutane	290110
isobutanol	290514
isobutyl acetate	291539
isohexane	290290
isophorondiisocyante	292910
isophthalic acid based unsaturated polyester resin	390791
isopropanol	290512
isopropyl acetate	291539
isopropylamine	292119
isoproturon	380893
jatropha seed	120799
joist, engineered wood	441899
jute plant, harvested	530310
kaolin	250700
kenaf plant, harvested	530310
kerosene	271000
keyboard	847160
kiwi	081050
kraft paper	4804
krypton, gaseous	280429
lactic acid	291811
laminated timber element, transversally prestressed, for outdoor use	441899
landed anchovy, fresh	030242
landed hake, fresh	030254
landed tuna, frozen, EPO	030345
lanthanum oxide	284690
lanthanum-cerium oxide	284690
laterite, mineral	260200
lauric diethanolamide	292419
lead	780110
lead concentrate	260700
lean concrete	382450
lemon	080550
lentil	071340
lentil seed, for sowing	071340
lettuce	070519
light clay brick	690100
light commercial vehicle	870421
light emitting diode	854140
light fuel oil	271000
light mortar	382450
lightweight concrete block, expanded clay	681011
lightweight concrete block, expanded perlite	681011
lightweight concrete block, expanded vermiculite	681011
lightweight concrete block, polystyrene	681011
lightweight concrete block, pumice	681011
lignite	270210
lignite briquettes	270220
lime	252220
lime mortar	382450
lime, hydrated, loose weight	252220
lime, hydrated, packed	252220
lime, hydraulic	252230
lime, packed	252220
limestone, crushed, for mill	252100
limestone, crushed, washed	252100
limestone, unprocessed	252100
linseed	120400
linseed seed, at farm	120400
linseed seed, for sowing	120400
liquefied petroleum gas	2711
liquid crystal display, minor components, auxilliaries and assembly effort	852990
liquid crystal display, unmounted	901380
liquid crystal display, unmounted, mobile device	901380
liquid manure tank trailer	871620
beverage carton, 1 L, for UHT milk (ambient)	481910
beverage carton, 1 L, for fresh milk (chilled)	481910
beverage carton, 1 L, for juice (ambient)	481910
liquid storage tank, chemicals, organics	730900
lithium	280519
lithium brine, 6.7 % Li	253090
lithium carbonate	283691
lithium chloride	282739
lithium fluoride	282619
lithium hexafluorophosphate	282690
lithium hydroxide	282520
lithium iron phosphate	283529
lithium manganese oxide	282520
lithium sulfate	283329
locomotive	860110
lorry with refrigeration machine, carbon dioxide, liquid as refrigerant, 16 metric ton	870422
lorry with refrigeration machine, R134a as refrigerant, 16 metric ton	870422
lorry, 16 metric ton	870422
lorry, 28 metric ton	870423
lorry, 40 metric ton	870423
low voltage system, for Li-ion battery	850790
lutetium oxide	284690
magnesium	810411
magnesium oxide	2519
magnesium sulfate	283321
magnesium-alloy, AZ91	810490
magnesium-alloy, AZ91, diecast	810490
magnetite	260111
maize flour	110220
maize grain	100590
maize grain, feed	100590
maize grain, feed, organic	100590
maize grain, organic	100590
maize seed, at farm	100510
maize seed, for sowing	100510
maize seed, organic, at farm	100510
maize seed, organic, for sowing	100510
maize silage	121490
maize silage, organic	121490
maize starch	110812
maleic anhydride	291714
maleic hydrazide	380893
maleic unsaturated polyester resin	390791
malusil	252620
mancozeb	380892
mandarin	080521
mandarin, fresh grade	080521
mandarin, processing grade	080521
maneb	380892
manganese	811100
manganese concentrate	260200
manganese dioxide	282010
manganese sulfate	283329
manganese(III) oxide	282090
mango	080450
mango seedling, for planting	060290
mango, conditioned	080450
marine electric motor	850152
marine engine	840810
marine fish	0301
mastic asphalt	271500
mattress	940421
mecoprop	380859
medium density fibreboard	441194
melamine	293361
melamine formaldehyde resin	390920
melamine urea formaldehyde adhesive	390920
melon	080719
mepiquat chloride	380893
mercury	280540
metal catalyst for catalytic converter	381512
metaldehyde	380859
metallization paste, back side	382499
metallization paste, back side, aluminium	382499
metallization paste, front side	382499
metamitron	380893
metazachlor	380893
methacrylic acid	291613
methallylchloride	290319
methylsulfonic acid	293090
methanol	290511
methanol, from biomass	290511
methyl acetate	291539
methyl acrylate	291612
methyl ethyl ketone	291412
methyl formate	291513
methyl iodide	290339
methyl methacrylate	291614
methyl t-butyl ether	290919
methyl-3-methoxypropionate	291899
methylamine	292111
methylchloride	290311
methylcyclohexane	290219
methylcyclopentane	290219
methylene diphenyl diisocyanate	292910
metolachlor	380893
micro gas turbine, 100kW electrical	841181
microwave oven	851650
millet	100829
mint	121190
mint seedling, for planting	060290
miscanthus rhizome, for planting	060110
miscanthus, chopped	121490
mischmetal	280530
mixed natural gas and biomethane, high pressure	271121
molasses, from sugar beet	170390
molybdenite	261390
molybdenum	810210
molybdenum trioxide	282570
monoammonium phosphate	310540
monochlorobenzene	290391
monochloropentafluoroethane	290339
monoethanolamine	292211
morpholine	293399
MOX fuel element, for light water reactor	840130
mulberry leaves	121190
multi-Si wafer	381800
multi-Si wafer, ribbon	854142
mustard	120750
N,N-dimethylformamide	292419
naphtha	271000
naphthalene sulfonic acid	290410
napropamide	380893
natural gas liquids	271111
natural gas, high pressure	271121
natural gas, high pressure, vehicle grade	271121
natural gas, liquefied	271111
natural gas, low pressure	271121
natural gas, low pressure, vehicle grade	271121
natural gas, medium pressure, vehicle grade	271121
natural stone plate, cut	680299
natural stone plate, grounded	680299
natural stone plate, polished	680299
navy bean	071339
navy bean seed, for sowing	120929
NCA hydroxide	282590
NCA oxide	282590
neodymium oxide	284690
neutralising agent, sodium hydroxide-equivalent	281512
nickel concentrate, 16% Ni	260400
nickel concentrate, 7% Ni	260400
nickel sulfate	283324
nickel, class 1	750210
nickel-rich materials	750120
nitrate salts, for solar power application	283429
nitric acid, without water, in 50% solution state	280800
nitric oxide	281129
nitrile-compound	292690
nitrobenzene	290420
nitro-compound	290420
nitrogen, liquid	280430
nitrous dioxide	281129
nitrous oxide	281129
NMC111 hydroxide	282590
NMC111 oxide	282590
NMC811 hydroxide	282590
NMC811 oxide	282590
N-methyl-2-pyrrolidone	293379
n-olefins	290129
non-ionic surfactant	340213
NPK (15-15-15) fertiliser	310520
NPK (26-15-15) fertiliser	310520
nuclear fuel element, for boiling water reactor, UO2 4.0% & MOX	840130
nuclear fuel element, for pressure water reactor, UO2 3.8% & MOX	840130
nuclear fuel element, for pressure water reactor, UO2 3.9% & MOX	840130
nuclear fuel element, for pressure water reactor, UO2 4.0% & MOX	840130
nuclear fuel element, for pressure water reactor, UO2 4.2% & MOX	840130
nuclear fuel element, for pressure water reactor, UO2 4.2% centrifuge & MOX	840130
nylon 6	390810
nylon 6, glass-filled	390810
nylon 6-6	390810
nylon 6-6, glass-filled	390810
o-aminophenol	292229
oat grain	100490
oat grain, feed	100490
oat seed, for sowing	100410
o-chlorobenzaldehyde	291300
o-chlorotoluene	290391
o-cresol	290712
octabenzone	291479
o-dichlorobenzene	290391
oil boiler, 100kW	840219
oil boiler, 10kW	840219
oil storage, 3000l	730900
olive	070992
onion	070310
onion seedling, for planting	060110
o-nitrophenol	290899
optical brighteners, for paper production	320420
orange, fresh grade	080510
orange, processing grade	080510
orbencarb	380893
organophosphorus-compound, unspecified	293139
oriented strand board	441012
o-phenylene diamine	292151
orthophthalic acid based unsaturated polyester resin	390791
outside air intake, stainless steel, DN 370	730729
oxalic acid	291711
oxygen, liquid	280440
ozone, liquid	285390
packaging film, low density polyethylene	392010
packaging glass, brown	701090
packaging glass, green	701090
packaging glass, white	701090
packaging, for fertilisers	392329
packaging, for fertilisers or pesticides	392329
packaging, for pesticides	392329
paclobutrazol	380892
palladium	711021
palm date	080410
palm date, conditioned and dried	080410
palm date, conditioned and dried, organic	080410
palm date, organic	080410
palm fruit bunch	140490
palm kernel meal	230660
palm kernel oil, crude	151321
palm oil, crude	151110
palm oil, refined	151190
panel glass, for cathode ray tube display	701120
papaya	080720
paper machine	843920
paper sack	481930
paper, melamine impregnated	481159
paper, newsprint	480100
paper, woodcontaining, lightweight coated	481022
paper, woodcontaining, supercalendered	480255
paper, woodfree, coated	481013
paper, woodfree, uncoated	480255
paraffin	271220
p-phenylene diamine	292151
paris market carrot	070610
particleboard, uncoated	441011
passenger car, diesel	870331
passenger car, electric, without battery	870380
passenger car, petrol/natural gas	870322
p-chlorophenol	290819
p-dichlorobenzene	290391
pea seed, for sowing	120991
pea seed, organic, for sowing	120991
peach	080930
peanut	120241
peanut seed, at farm	120230
peanut seed, for sowing	120230
pear	080830
peat	270300
peat moss	270300
pendimethalin	380893
pentaerythritol	290542
pentane	290110
perfluoropentane	290339
perlite	253010
permanent magnet, for electric motor	850511
pesticide, unspecified	380899
petrol, 15% ETBE additive by volume, with ethanol from biomass	271000
petrol, 4% ETBE additive by volume, with ethanol from biomass	271000
petrol, 5% ethanol by volume from biomass	271000
petrol, 85% ethanol by volume from biomass	271000
petrol, low-sulfur	271000
petrol, two-stroke blend	271000
petrol, unleaded	271000
petroleum	270900
petroleum coke	271312
petroleum slack wax	271290
phacelia silage	121490
phenol	290711
phenolic resin	390940
phenoxy-compound	290930
phenyl acetic acid	291634
phenyl isocyanate	292910
phosgene, liquid	281211
phosphane	380899
phosphate rock, beneficiated	251020
phosphoric acid, fertiliser grade, without water, in 70% solution state	280920
phosphoric acid, industrial grade, without water, in 85% solution state	280920
phosphorous chloride	281219
phosphorus oxychloride	281212
phosphorus pentachloride	281214
phosphorus trichloride	281213
phosphorus, white, liquid	280470
photovoltaic cell, multi-Si wafer	854142
photovoltaic cell, ribbon-Si	854142
photovoltaic cell, single-Si wafer	854142
photovoltaic laminate, a-Si	854143
photovoltaic laminate, CdTe	854143
photovoltaic laminate, CIS	854143
photovoltaic laminate, multi-Si wafer	854143
photovoltaic laminate, ribbon-Si	854143
photovoltaic laminate, single-Si wafer	854143
photovoltaic panel, a-Si	854143
photovoltaic panel, CIS	854143
photovoltaic panel, multi-Si wafer	854143
photovoltaic panel, ribbon-Si	854143
photovoltaic panel, single-Si wafer	854143
photovoltaics, electric installation for 570kWp module, open ground	850239
phthalic anhydride	291735
phthalimide	292519
phthalimide-compound	292519
pig iron	720110
pineapple	080430
pinto bean	071333
pinto bean seed, for sowing	120929
piperidine	293339
pitch	270810
pitch despergents, in paper production	380894
plastic granulate, unspecified, recycled	391590
plasticiser, for concrete, based on sulfonated melamine formaldehyde	382440
platinum	711011
platinum group metal concentrate	261690
plug, inlet and outlet, for computer cable	853669
plug, inlet and outlet, for network cable	853669
plug, inlet and outlet, for printer cable	853669
plywood	4412
p-nitrophenol	290899
m-nitrotoluene	290420
o-nitrotoluene	290420
p-nitrotoluene	290420
pointing device, optical mouse, with cable	847160
polarizer, liquid crystals and colour filters, for liquid crystal display	901380
polyacrylamide	390690
polyaluminium chloride	282732
polybutadiene	400220
polycarbonate	390740
polydimethylsiloxane	391000
polyester resin, unsaturated	390791
polyester-complexed starch biopolymer	390799
polyethylene pipe, corrugated, DN 75	391721
polyethylene pipe, DN 200, SDR 41	391721
polyethylene terephthalate, granulate, amorphous	390761
polyethylene terephthalate, granulate, amorphous, recycled	390761
polyethylene terephthalate, granulate, bottle grade	390761
polyethylene terephthalate, granulate, bottle grade, recycled	390761
polyethylene, high density, granulate	390120
polyethylene, high density, granulate, recycled	390120
polyethylene, linear low density, granulate	390110
polyethylene, low density, granulate	390110
polylactic acid, granulate	390770
polymethyl methacrylate, beads	390610
polymethyl methacrylate, sheet	392051
polyether polyols, long chain	390720
polyether polyols, short chain	390720
polyphenylene sulfide	390890
polypropylene, granulate	390210
polystyrene foam slab	392111
polystyrene foam slab for perimeter insulation	392111
polystyrene foam slab with graphite, 6% recycled	392111
polystyrene foam slab, 10% recycled	392111
polystyrene, expandable	390311
polystyrene, extruded	392111
polystyrene, general purpose	390319
polystyrene, high impact	390319
polysulfide, sealing compound	321410
polysulfone	391190
polyurethane adhesive	350691
polyurethane, flexible foam	392113
polyurethane, flexible foam, flame retardant	392113
polyurethane, rigid foam	392113
polyvinylchloride, bulk polymerised	390410
polyvinylchloride, emulsion polymerised	390410
polyvinylchloride, suspension polymerised	390410
polyvinylfluoride	390469
polyvinylfluoride, dispersion	390469
polyvinylfluoride, film	392099
polyvinylidenchloride, granulate	390469
pomegranate	081090
portachrom	261000
portafer	282110
potash salt	310420
potassium carbonate	283640
potassium chloride	310420
potassium chloride, industrial grade	310420
potassium hydroxide	281520
potassium nitrate	283421
potassium nitrate, agricultural grade	283421
potassium nitrate, industrial grade	283421
potassium nitrate, technical grade	283421
potassium perchlorate	282990
potassium permanganate	284161
potassium sulfate	310430
potato	070190
potato seed, at farm	070110
potato seed, for setting	070110
potato seed, organic, at farm	070110
potato seed, organic, for setting	070110
potato starch	110813
potato, organic	070190
potentiometer, unspecified	853340
powder coat, aluminium sheet	320810
powder coat, steel	320810
power adapter, for laptop	850440
power adapter, for smartphone	850440
power distribution unit, for electric passenger car	853710
power saw, with catalytic converter	846781
power saw, without catalytic converter	846781
power supply unit, for desktop computer	850440
powertrain, for electric passenger car	850300
praseodymium oxide	284690
praseodymium-neodymium oxide	284690
printed paper	491199
printed paper, offset	491199
printed wiring board, for power supply unit, desktop computer, Pb containing	853400
printed wiring board, for power supply unit, desktop computer, Pb free	853400
printed wiring board, for surface mounting, Pb containing surface	853400
printed wiring board, for surface mounting, Pb free surface	853400
printed wiring board, for through-hole mounting, Pb containing surface	853400
printed wiring board, for through-hole mounting, Pb free surface	853400
printed wiring board, mounted mainboard, desktop computer, Pb containing	847330
printed wiring board, mounted mainboard, desktop computer, Pb free	847330
printed wiring board, mounted mainboard, laptop computer, Pb containing	847330
printed wiring board, mounted mainboard, laptop computer, Pb free	847330
printed wiring board, mounted mainboard, mobile device, double-sided, Pb free	847330
printed wiring board, surface mounted, unspecified, Pb containing	853400
printed wiring board, surface mounted, unspecified, Pb free	853400
printed wiring board, through-hole mounted, unspecified, Pb containing	853400
printed wiring board, through-hole mounted, unspecified, Pb free	853400
printer, laser, black/white	844332
printer, laser, colour	844332
printing ink, offset, without solvent, in 47.5% solution state	3215
printing ink, rotogravure, without solvent, in 55% toluene solution state	3215
prochloraz	380892
prohexadione calcium	380893
propanal	291219
propane	271112
propionic acid	291550
propyl amine	292119
propylene	290122
propylene glycol, liquid	290532
propylene oxide, liquid	291020
prosulfocarb	380893
protein pea	210610
protein pea, organic	210610
pulpwood, softwood, measured as solid wood under bark	4403
pulverised lignite	270210
pumice	251310
pump, 40W	841319
purified terephthalic acid	291736
purse seiner, steel	890200
purse seiner, wood	890200
pyrazole	293319
pyrethroid-compound	292690
pyridazine-compound	293319
pyridine	293331
pyridine-compound	293331
pyrochlore concentrate	261590
quicklime, in pieces, loose	252210
quicklime, milled, loose	252210
quicklime, milled, packed	252210
radish	070690
rape meal	230641
rape oil, crude	151411
rape seed	120510
rape seed, for sowing	120510
rape seed, organic	120510
rape seed, organic, for sowing	120510
rare earth carbonate concentrate	284690
rare earth oxide concentrate, 50% REO	284690
rare earth oxide concentrate, 70% REO	284690
red kidney bean	071333
red kidney bean seed, for sowing	120929
red meat, live weight	010229
reefer, intermodal shipping container, 40-foot, high-cube, carbon dioxide, liquid as refrigerant	860900
reefer, intermodal shipping container, 40-foot, high-cube, R134a as refrigerant	860900
reeled raw silk hank	500200
refinery gas	271129
reformate	271000
refractory material, acid	690210
refractory, basic, packed	690220
refractory, fireclay, packed	690210
refractory, high aluminium oxide, packed	690220
refrigerant R134a	290339
refrigeration machine, carbon dioxide, liquid as refrigerant	841869
refrigeration machine, R134a as refrigerant	841869
refrigerator	841829
reinforcing steel	721420
residual hardwood, wet	440140
residual softwood, wet	440140
residual wood, dry	440140
resistor, auxilliaries and energy use	853321
resistor, metal film type, through-hole mounting	853321
resistor, surface-mounted	853321
resistor, wirewound, through-hole mounting	853321
resorcinol	290721
retention aid, for paper production	390690
rhodium	711590
rice seed, for sowing	100610
rice, basmati	100610
rice, non-basmati	100610
rolling mill	8455
clay roof tile	690510
room-connecting overflow element, steel, approx. 40 m3/h	730799
rosin size, for paper production	380620
router, internet	851762
rutile, 95% titanium dioxide	261400
rye grain	100290
rye grain, feed, organic	100290
rye grain, organic	100290
rye seed, for sowing	100210
rye seed, organic, for sowing	100210
ryegrass silage	121490
ryegrass-Egyptian&Persian clover-mixture silage	121490
ryegrass-red&Egyptian clover-mixture silage	121490
salicylic acid	291821
salt	250100
samarium oxide	284690
samarium-europium-gadolinium oxide	284690
sand	2505
sand-lime brick	681011
sanitary ceramics	6910
sawdust, loose, wet, measured as dry mass	440140
sawdust, wet, measured as dry mass	440140
sawlog and veneer log, meranti, debarked, measured as solid wood	440341
sawlog and veneer log, paraná pine, measured as solid wood under bark	440322
sawlog and veneer log, softwood, debarked, measured as solid wood	4403
sawlog and veneer log, softwood, measured as solid wood under bark	4403
sawnwood, azobe, dried (u=15%), planed	440729
sawnwood, beam, hardwood, dried (u=10%), planed	4407
sawnwood, beam, hardwood, dried (u=20%), planed	4407
sawnwood, beam, hardwood, raw, dried (u=10%)	4407
sawnwood, beam, hardwood, raw, dried (u=20%)	4407
sawnwood, beam, softwood, dried (u=10%), planed	4407
sawnwood, beam, softwood, dried (u=20%), planed	4407
sawnwood, beam, softwood, raw, dried (u=10%)	4407
sawnwood, beam, softwood, raw, dried (u=20%)	4407
sawnwood, board, hardwood, dried (u=10%), planed	4407
sawnwood, board, hardwood, dried (u=20%), planed	4407
sawnwood, board, hardwood, raw, dried (u=10%)	4407
sawnwood, board, hardwood, raw, dried (u=20%)	4407
sawnwood, board, softwood, dried (u=10%), planed	4407
sawnwood, board, softwood, dried (u=20%), planed	4407
sawnwood, board, softwood, raw, dried (u=10%)	4407
sawnwood, board, softwood, raw, dried (u=20%)	4407
sawnwood, hardwood, dried (u=10%), planed	4407
sawnwood, hardwood, dried (u=20%), planed	4407
sawnwood, hardwood, raw	4407
sawnwood, hardwood, raw, dried (u=10%)	4407
sawnwood, hardwood, raw, dried (u=20%)	4407
sawnwood, lath, hardwood, dried (u=10%), planed	4409
sawnwood, lath, hardwood, dried (u=20%), planed	4409
sawnwood, lath, hardwood, raw, dried (u=10%)	4409
sawnwood, lath, hardwood, raw, dried (u=20%)	4409
sawnwood, lath, softwood, dried (u=10%), planed	4409
sawnwood, lath, softwood, dried (u=20%), planed	4409
sawnwood, lath, softwood, raw, dried (u=10%)	4409
sawnwood, lath, softwood, raw, dried (u=20%)	4409
sawnwood, paraná pine, dried (u=10%)	440322
sawnwood, softwood, dried (u=10%), planed	4407
sawnwood, softwood, dried (u=20%), planed	4407
sawnwood, softwood, raw	4407
sawnwood, softwood, raw, dried (u=10%)	4407
sawnwood, softwood, raw, dried (u=20%)	4407
scandium oxide	284690
seal, natural rubber based	401693
sealing tape, aluminium/PE, 50 mm wide	760720
seawater reverse osmosis module	842121
seed-cotton	120721
seed-cotton, organic	120721
selective coat, stainless steel sheet, black chrome	320890
selenium	280490
sesame seed	120740
shale	250840
shavings, hardwood, loose, measured as dry mass	440140
shavings, hardwood, measured as dry mass	440140
shavings, softwood, loose, measured as dry mass	440140
shavings, softwood, measured as dry mass	440140
sheep fleece in the grease	510119
sheep for slaughtering, live weight	010410
silencer, steel, DN 125	732690
silencer, steel, DN 315, 50 mm	732690
silica sand	250510
silicon carbide	284920
silicon tetrachloride	281290
silicon tetrahydride	285000
silicon, electronics grade	280461
silicon, metallurgical grade	280469
silicon, multi-Si, casted	280461
silicon, single crystal, Czochralski process, electronics	280461
silicon, single crystal, Czochralski process, photovoltaics	280461
silicon, solar grade	280461
silicone product	391000
silky fibre	500300
silver	710691
silver, unrefined	710691
single superphosphate	310319
single-Si wafer, for electronics	381800
single-Si wafer, photovoltaic	854142
skimmed milk, from cow milk	040110
slab and siding, hardwood, wet, measured as dry mass	440399
slab and siding, softwood, wet, measured as dry mass	440399
small pelagic fish, fresh	0301
soap	3401
soda ash, dense	283620
soda ash, light	283620
sodium	280511
sodium aluminate, powder	285390
sodium amide	292419
sodium arsenide	285390
sodium bicarbonate	283630
sodium borates	252800
sodium chlorate, powder	282911
sodium chloride, brine solution	250100
sodium chloride, powder	250100
sodium chloroacetate	291539
sodium cumenesulphonate	290410
sodium cyanide	283711
sodium dichromate	284130
sodium dithionite, anhydrous	283110
sodium ethoxide	290519
sodium ethyl xanthate	293090
sodium fluoride	282619
sodium formate	291512
sodium hydrogen sulfate	283319
sodium hydrogen sulfite	283210
sodium hydrosulfide	283010
sodium hydroxide, without water, in 50% solution state	281511
sodium hypochlorite production, product in 15% solution state	282890
sodium hypochlorite, without water, in 15% solution state	282890
sodium metasilicate pentahydrate, 58% active substance, powder	283911
sodium methoxide	290511
sodium nitrate	310250
sodium nitrate, technical grade	310250
sodium nitrate, unrefined	310250
sodium nitrite	283410
sodium oxide	281129
sodium perchlorate	282990
sodium persulfate	283340
sodium phenolate	290711
sodium phosphate	283522
sodium pyrophosphate	283539
sodium silicate, solid	283919
sodium silicate, spray powder, 80%	283919
sodium silicate, without water, in 37% solution state	283919
sodium silicate, without water, in 48% solution state	283919
sodium silver thiosulfate	380893
sodium sulfate, anhydrite	283311
sodium sulfide	283010
sodium sulfite	283210
sodium tetrafluoroborate	284020
sodium tetrahydridoborate	284020
sodium tripolyphosphate	283531
soft solder, Sn97Cu3	831130
solar collector glass tube, with silver mirror	700991
solar glass, low-iron	7005
solder, bar, Sn63Pb37, for electronics industry	831130
solder, bar, Sn95.5Ag3.9Cu0.6, for electronics industry	831130
solder, paste, Sn63Pb37, for electronics industry	381010
solder, paste, Sn95.5Ag3.9Cu0.6, for electronics industry	381010
solid bleached and unbleached board carton	481920
solvent for chromatography analysis	382200
solvent for paint	381400
solvent, organic	290220
soybean	120190
soybean beverage	220299
soybean meal	120810
soybean oil, crude	150710
soybean oil, refined	150790
soybean seed, for sowing	120110
soybean seed, organic, for sowing	120110
soybean, feed	120190
soybean, organic	120190
spinach	070970
spiral-seam duct, steel, DN 125	730650
spiral-seam duct, steel, DN 400	730650
spodumene	253090
sponge iron	720390
stalk	140190
stearic acid	291570
steatite	252610
steel, chromium steel 18/8	7218
steel, chromium steel 18/8, hot rolled	7218
steel, low-alloyed	7224
steel, low-alloyed, hot rolled	7224
steel, unalloyed	7206
stibnite concentrate	261710
stone groundwood pulp	470100
stone meal	251749
stone wool	680610
stone wool, packed	680610
storage, 10'000 l	730900
straw	121300
straw, organic	121300
straw, stand-alone production	121300
strawberry	081010
strawberry seedling, for planting	060220
strontium carbonate	283692
strontium sulfate, 90% SrSO4	283329
structural timber	4407
stucco	252020
styrene	290250
styrene-acrylonitrile copolymer	390320
succinic acid	291719
sugar beet	121291
sugar beet pulp	230320
sugar beet seed, for sowing	120910
sugar, from sugar beet	170112
sugar, from sugarcane	170113
sugarcane	121293
sulfamic acid	281119
sulfate pulp, bleached	470321
sulfate pulp, unbleached	470311
sulfite	283220
sulfite pulp, bleached	470421
sulfur	250300
sulfur dichloride	281216
sulfur dioxide, liquid	281129
sulfur hexafluoride, liquid	281290
sulfur trioxide	281129
sulfuric acid	280700
sulfuryl chloride	281290
sunflower seed	120600
sunflower seed, for sowing	120600
sunflower silage	121490
sunn hemp plant, harvested	530310
supplementary cementitious materials	382450
supply air inlet, steel/SS, DN 75	730729
sweet corn	071040
sweet sorghum grain	100790
sweet sorghum stem	121299
swine for slaughtering, live weight	010392
switch, toggle type	853650
synthetic gas	271129
synthetic rubber	4002
tall oil, crude	380300
tanker, for liquefied natural gas	890120
tanker, for liquid goods other than petroleum and liquefied natural gas	890120
tanker, for petroleum	890120
tantalum concentrate, 30% Ta2O5	261590
tantalum powder, capacitor-grade	810320
tea, dried	0902
tebuconazole	380892
television	852872
tellurium, semiconductor-grade	280450
terbium oxide	284690
terbium-dysprosium oxide	284690
t-butyl amine	292119
tetrachloroethylene	290323
tetraethyl orthosilicate	292090
tetrafluoroethylene	290339
tetrafluoroethylene film, on glass	392099
tetrahydrofuran	293211
textile, jute	531010
textile, kenaf	531010
textile, knit cotton	600622
textile, nonwoven polyester	560394
textile, nonwoven polypropylene	560311
textile, silk	500720
textile, woven cotton	520811
thermal plaster, outdoor	680990
thermo-mechanical pulp	470100
thionyl chloride	281217
three and five layered board	441899
thulium oxide	284690
tilapia	0302
tilapia feed, 24-28% protein	230990
tin	800110
tin concentrate	260900
tin dioxide	282590
tin plated chromium steel sheet, 2 mm	721090
tissue paper	480300
titanium	810820
titanium dioxide	282300
titanium sponge	810820
titanium tetrachloride	282739
titanium zinc plate, without pre-weathering	790500
titanium, triple-melt	810890
tofu	210690
toluene diisocyanate	292910
toluene, liquid	290230
tomato seedling, for planting	060290
tomato, fresh grade	070200
tomato, processing grade	070200
toner module, laser printer, black/white	844399
toner module, laser printer, colour	844399
toner, black, powder	370790
toner, colour, powder	370790
tractor, 4-wheel, agricultural	870192
train, passenger, high speed	860210
train, passenger, long-distance	860310
train, passenger, regional	860310
tram	860310
transformer, high voltage use	850434
transformer, low voltage use	850433
transistor, auxilliaries and energy use	854121
transistor, surface-mounted	854121
transistor, wired, big size, through-hole mounting	854121
transistor, wired, small size, through-hole mounting	854121
trawler, steel	890200
tree seedling, for planting	060290
triazine-compound	293369
trichloroacetic acid	291540
trichloroborane	281290
trichloroethylene	290322
chloroform	290313
trichloropropane	290319
triclopyr	380893
triethanolamine	292215
triethyl amine	292119
triethylene glycol	290949
trifluoroacetic acid	291590
trifluoromethane	290341
trimesoyl chloride	291739
trimethyl borate	292090
trimethylamine	292111
trinexapac-ethyl	380893
triphenyl phosphate	291990
triple superphosphate	310311
tris(2,4-ditert-butylphenyl) phosphite	292029
trisodium phosphate	283529
trout	030211
trout feed, 42% protein	230990
tube insulation, elastomere	400911
tubular particleboard	441011
tungsten carbide powder	284990
tungsten concentrate	261100
turpentine	380510
ultrafiltration module	842199
ultraviolet lamp	853949
unreinforced concrete, 15MPa	681099
uranium hexafluoride	284410
uranium ore, as U	261210
uranium, enriched 3.0%, in fuel element for light water reactor	284420
uranium, enriched 3.0%, per separative work unit	284420
uranium, enriched 3.8%, in fuel element for light water reactor	284420
uranium, enriched 3.8%, per separative work unit	284420
uranium, enriched 3.9%, in fuel element for light water reactor	284420
uranium, enriched 3.9%, per separative work unit	284420
uranium, enriched 4%, in fuel element for light water reactor	284420
uranium, enriched 4.0%, per separative work unit	284420
uranium, enriched 4.2%, in fuel element for light water reactor	284420
uranium, enriched 4.2%, per separative work unit	284420
uranium, in yellowcake	284410
urea	310210
urea ammonium nitrate mix	310280
urea formaldehyde foam slab, hard	392119
urea formaldehyde foam, in situ foaming	390910
urea formaldehyde resin	390910
vacuum cleaner	8508
vanilla	0905
vanilla seedling, for planting	060290
vegetable oil, refined	151590
ventilation control and wiring, central unit	841583
ventilation control and wiring, decentralized unit	853710
ventilation duct, connection piece, steel, 100x50 mm	730799
ventilation duct, elbow 90°, steel, 100x50 mm	730799
ventilation duct, steel, 100x50 mm	730799
ventilation of dwellings, central, 1 x 720 m3/h	841480
ventilation of dwellings, decentralized, 6 x 120 m3/h	841459
ventilation system, central, 1 x 720 m3/h, polyethylene ducts, with earth tube heat exchanger	841583
ventilation system, central, 1 x 720 m3/h, steel ducts, with earth tube heat exchanger	841583
ventilation system, decentralized, 6 x 120 m3/h, polyethylene ducts	841459
ventilation system, decentralized, 6 x 120 m3/h, polyethylene ducts, with earth tube heat exchanger	841459
ventilation system, decentralized, 6 x 120 m3/h, steel ducts	841459
ventilation system, decentralized, 6 x 120 m3/h, steel ducts, with earth tube heat exchanger	841459
vermiculite	253010
vinyl acetate	291532
vinyl carbonate	292090
vinyl chloride	290321
vinyl fluoride	290339
wafer, fabricated, for integrated circuit	854159
washing machine	845020
waste collection lorry, 21 metric ton	870423
water pump, 22kW	841370
water storage	730900
wax, lost-wax casting	340490
weaned calves, live weight	010229
weaned heifers, live weight	010229
wheat bran	230230
wheat flour	110100
wheat flour mix	190190
wheat grain	100199
wheat grain, feed	100199
wheat grain, feed, organic	100199
wheat grain, organic	100199
wheat seed, for sowing	100191
wheat seed, organic, for sowing	100191
whey	040410
white asparagus	070920
white lined chipboard carton	481920
wind turbine network connection, 2MW, onshore	853720
wind turbine network connection, 4.5MW, onshore	853720
wind turbine network connection, 750kW, onshore	853720
window frame, aluminium, U=1.6 W/m2K	761010
window frame, poly vinyl chloride, U=1.6 W/m2K	392520
window frame, wood, U=1.5 W/m2K	441810
window frame, wood-metal, U=1.6 W/m2K	730830
wood chips and particles, willow	440122
wood chips, dry, measured as dry mass	440122
wood chips, from post-consumer wood, measured as dry mass	440122
wood chips, wet, measured as dry mass	440122
wood cladding, softwood	440910
wood pellet, measured as dry mass	440131
wood preservative, creosote	380700
wood preservative, inorganic salt, containing Cr	380891
wood preservative, organic salt, Cr-free	380891
wood preservative, organic, indoor use, dry	380891
wood preservative, organic, indoor use, occasionally wet	380891
wood preservative, organic, outdoor use, no ground contact	380891
wood preservative, water-based, indoor use, dry	380891
wood preservative, water-based, indoor use, occasionally wet	380891
wood preservative, water-based, outdoor use, no ground contact	380891
wood wool	440500
woven bamboo mat	460121
xenon, gaseous	280429
xylene, mixed	290244
o-xylene	290241
p-xylene	290243
yarn, cotton	520710
yarn, jute	530710
yarn, kenaf	530890
yarn, silk	500400
yogurt, from cow milk	040310
ytterbium oxide	284690
yttrium oxide	284690
zinc	790111
zinc concentrate	260800
zinc monosulfate	283329
zinc oxide	281700
zinc sulfide	283090
zineb	380892
zircon	261510
zirconium oxide	282560
zirconium sponge, nuclear-grade	810920
zirconium tetrachloride	282739
zucchini	070993
consumer electronics, mobile device, smartphone	851712
consumer electronics, mobile device, tablet	847130
electronic component, passive, mobile, earpiece and speaker	851829
diesel-electric generating set, 10MW	850213
diesel-electric generating set, 18.5kW	850211
machine, for treatment of waste electric and electronic equipment	847989
pipeline, liquid manure	730490
railway track, for high-speed train	730210
tram track	730210
railway track	730210
pipeline, petroleum, offshore	730511
pipeline, petroleum	730419
bamboo culm	140110
chipper, mobile, diesel	843680
chipper, stationary, electric	843680
electric parts, heat and power co-generation unit, 160kW electrical	850300
electric parts, mini CHP plant	850300
elevator, hydraulic	842810
eucalyptus seedling, for planting	060290
evacuated tube collector	841990
fan, for power supply unit, desktop computer	841459
ferrite	850511
fibre, viscose	550410
forestry harvester	843680
forwarder	843680
harvester	843351
heat and power co-generation unit, 160kW electrical, common components for heat+electricity	850239
heat and power co-generation unit, 160kW electrical, components for electricity only	850300
heat and power co-generation unit, 160kW electrical, components for heat only	841950
heat and power co-generation unit, 1MW electrical, common components for heat+electricity	850239
heat and power co-generation unit, 1MW electrical, components for heat only	841950
heat and power co-generation unit, 1MWel, 6.4MWth	841950
heat and power co-generation unit, 200kW electrical, common components for heat+electricity	850239
heat and power co-generation unit, 200kW electrical, components for electricity only	850300
heat and power co-generation unit, 200kW electrical, components for heat only	841950
heat and power co-generation unit, 200kW electrical, diesel SCR, common components for heat+electricity	850212
heat and power co-generation unit, 200kW electrical, diesel SCR, components for electricity only	850300
heat and power co-generation unit, 200kW electrical, diesel SCR, components for heat only	841950
heat and power co-generation unit, 500kW electrical, common components for heat+electricity	850239
heat and power co-generation unit, 500kW electrical, components for heat only	841950
heat and power co-generation unit, 50kW electrical, components for electricity only	850300
heat and power co-generation unit, 50kW electrical, components for heat only	841950
heat and power co-generation unit, 6400kW thermal, common components for heat+electricity	841950
heat and power co-generation unit, organic Rankine cycle, 1000kW electrical	840219
heat and power co-generation unit, organic Rankine cycle, 1400kW thermal, common components, heat+electricity	841950
heat and power co-generation unit, organic Rankine cycle, 1400kW thermal, components for electricity only	841950
heat and power co-generation unit, organic Rankine cycle, 1MWe, 6.4 MWth	841950
heat and power co-generation unit, organic Rankine cycle, 200kW electrical	840219
heat and power co-generation unit, organic Rankine cycle, 3MW electrical	840219
heat transport fluid system, solar thermal parabolic trough, 50 MW	841989
heating and sanitary equipment, heat and power co-generation unit, 160kW electrical	732290
heating and sanitary equipment, mini CHP plant	732290
landed anchovy by-catch, fresh	0301
long liner, steel	890200
lubricating oil	271000
maize chop	121490
metal working machine, unspecified	8462
mini CHP plant, common components for heat+electricity	850239
mini CHP plant, components for electricity only	850300
mini CHP plant, components for heat only	841950
mobile cable yarder, trailer-mounted	842890
mobile cable yarder, truck-mounted, incl. processor	870590
motor scooter, 50 cubic cm engine	871110
photovoltaic module, building-integrated, for facade installation	854142
photovoltaic module, building-integrated, for slanted-roof installation	854142
photovoltaic mounting system, for 570kWp open ground module	761090
photovoltaic mounting system, for facade installation	761090
photovoltaic mounting system, for flat-roof installation	761090
photovoltaic mounting system, for slanted-roof installation	761090
photovoltaic slanted-roof installation, 3kWp, a-Si, laminated, integrated, on roof	854143
photovoltaic slanted-roof installation, 3kWp, a-Si, panel, mounted, on roof	854143
photovoltaic slanted-roof installation, 3kWp, CdTe, laminated, integrated, on roof	854143
photovoltaic slanted-roof installation, 3kWp, CIS, panel, mounted, on roof	854143
photovoltaic slanted-roof installation, 3kWp, multi-Si, laminated, integrated, on roof	854143
photovoltaic slanted-roof installation, 3kWp, multi-Si, panel, mounted, on roof	854143
photovoltaic slanted-roof installation, 3kWp, ribbon-Si, laminated, integrated, on roof	854143
photovoltaic slanted-roof installation, 3kWp, ribbon-Si, panel, mounted, on roof	854143
photovoltaic slanted-roof installation, 3kWp, single-Si, laminated, integrated, on roof	854143
photovoltaic slanted-roof installation, 3kWp, single-Si, panel, mounted, on roof	854143
power block, solar thermal parabolic trough, 50 MW	841989
power block, solar tower power plant, 20 MW	841989
powertrain, for electric scooter	850300
pulpwood, hardwood, measured as solid wood under bark	4403
receiver system, solar tower power plant, 20 MW	841989
sawlog and veneer log, azobe, debarked, measured as solid wood	440349
sawlog and veneer log, azobe, measured as solid wood under bark	440349
sawlog and veneer log, eucalyptus ssp., measured as solid wood under bark	440398
sawlog and veneer log, hardwood, measured as solid wood under bark	440399
sawlog and veneer log, meranti, measured as solid wood under bark	440341
selective coat, aluminium sheet, nickel pigmented aluminium oxide	320890
selective coat, copper sheet, black chrome	320890
selective coat, copper sheet, black majic	320890
selective coat, copper sheet, physical vapour deposition	320890
selective coat, copper sheet, sputter deposition	320890
shale brick	690100
skidder	843680
solar collector system, Cu flat plate collector, multiple dwelling, hot water	841989
solar collector system, Cu flat plate collector, one-family house, combined system	841989
solar collector system, Cu flat plate collector, one-family house, hot water	841989
solar collector system, with evacuated tube collector, one-family house, combined system	841989
sound insulation, heat and power co-generation unit, 160kW electrical	680690
sputtering target, sintered, indium tin oxide	382499
start-up, heat and power co-generation unit, 160kW electrical	850300
steam generation system, solar tower power plant, 20 MW	840290
stirling heat and power co-generation unit, 3kW electrical, wood pellet, future	850239
storage, 650 l mini CHP plant	730900
thermal energy storage, for adiabatic compressed air energy storage	841950
thermal storage system, solar thermal parabolic trough, 50 MW	841950
thermal storage system, solar tower power plant, 20 MW	841950
trellis system, wooden poles, soft wood, tar impregnated	440311
white spirit	271000
wind power plant, 2MW, offshore, fixed parts	850231
wind power plant, 2MW, offshore, moving parts	850231
wind power plant, 800kW, fixed parts	850231
wind power plant, 800kW, moving parts	850231
wind turbine, 2.3MW, onshore	850231
wind turbine, 2MW, onshore	850231
wind turbine, 4.5MW, onshore	850231
wind turbine, 750kW, onshore	850231
zinc coat, coils	790700
zinc coat, pieces	790700
